1  
2  
3  
4  
5  
6  
7  
8  
9  
10  
11  
12  
13  
14  
15  
16  
17  
18  
19  
20

*ASTN2 modulates synaptic strength by trafficking and degradation of  
surface proteins*

Hourinaz Behesti<sup>1</sup>, Taylor Fore<sup>2</sup>, Peter Wu<sup>1</sup>, Zachi Horn<sup>1</sup>, Mary Leppert<sup>3</sup>, Court Hull<sup>2</sup>  
and Mary E Hatten<sup>1\*</sup>

<sup>1</sup> Laboratory of Developmental Neurobiology, The Rockefeller University, 1230 York Avenue, New York,  
NY, 10065

<sup>2</sup> Duke Institute for Brain Sciences, Duke University, 311 Research Drive, Bryan Bldg, Durham, NC, 27710

<sup>3</sup> Kennedy Krieger Institute, Center for Development and Learning, 707 North Broadway, Baltimore, MD  
21205

\*Corresponding author: [hatten@rockefeller.edu](mailto:hatten@rockefeller.edu)

1

2 **Abstract**

3       Surface protein dynamics dictate synaptic connectivity and function in  
4 neuronal circuits. *ASTN2*, a gene disrupted by copy number variations (CNVs) in  
5 neurodevelopmental disorders, including autism spectrum, was previously shown  
6 to regulate the surface expression of *ASTN1* in glial-guided neuronal migration.  
7 Here, we demonstrate that *ASTN2* binds to and regulates the surface expression of  
8 multiple synaptic proteins in post-migratory neurons by endocytosis, resulting in  
9 modulation of synaptic activity. In cerebellar Purkinje cells (PCs), by immuno-gold  
10 electron microscopy, *ASTN2* localizes primarily to endocytic and autophagocytic  
11 vesicles in the cell soma and in subsets of dendritic spines. Overexpression of *ASTN2*  
12 in PCs, but not of *ASTN2* lacking the FNIII-domain commonly disrupted by CNVs in  
13 patients including in a family presented here, increases inhibitory and excitatory  
14 postsynaptic activity and reduces levels of *ASTN2* binding partners. Our data  
15 suggest a fundamental role for *ASTN2* in dynamic regulation of surface proteins by  
16 endocytic trafficking and protein degradation.

17

18 Key words: *ASTN2*, neurodevelopmental disorder, synapse, protein degradation,  
19 cerebellum, protein trafficking

20

## 1 **\body**

### 2 **Introduction**

3           ASTN2 is a large vertebrate-specific transmembrane protein, expressed in  
4 the developing and adult brain, with the highest levels detected in the cerebellum  
5 (1). Previously, we showed that ASTN2 interacts with ASTN1, a surface membrane  
6 protein that regulates glial-guided neuronal migration (1-4). Recently, copy number  
7 variations (CNVs) of *ASTN2*, both deletions and duplications (see Fig. S1), were  
8 identified in patients with neurodevelopmental disorders (NDDs) including autism  
9 spectrum disorder (ASD), schizophrenia, attention-deficit/hyperactivity disorder  
10 (ADHD), bipolar disease, intellectual disability (ID), and global developmental delay  
11 (5-9). In particular, *ASTN2* CNVs mainly affected the MAC/Perforin (MACPF) and the  
12 FNIII encoding regions of the gene and were identified as a significant risk factor for  
13 ASD in males in a study of 89,985 subjects (10).

14  
15           Despite shared protein homology, ASTN2 but not ASTN1, is highly expressed  
16 in the adult cerebellum, long after completion of neuronal migration, suggestive of  
17 key additional roles unrelated to migration. While the cerebellum has traditionally  
18 been associated with motor control, recent evidence has suggested non-motor  
19 functions including language, visuospatial memory, attention, and emotion (11-13).  
20 In particular, loss of cerebellar Purkinje cells (PCs), is one of the most consistent  
21 findings in post-mortem studies in ASD patients (14). Moreover, specific targeting of  
22 cerebellar neurons in mouse models of ASD-associated genes, leads to impaired  
23 cerebellar learning (15) and social behaviors (16). The mechanism of action of

1 ASTN2 in post-migratory neurons and how it may contribute to the pathophysiology  
2 of NDDs is currently unknown.

3

4 Here, we describe a family with a paternally inherited intra-genic *ASTN2*  
5 duplication and NDD including ASD, and most notably learning difficulty and speech  
6 and language delay. By immuno-gold electron microscopy (EM), we show that  
7 *ASTN2* localizes primarily to vesicles in PC soma and to subsets of dendritic spines.  
8 By immunoprecipitation/mass spectrometry (IP/mass spec), we identify *ASTN2*  
9 binding partners including C1q, Neuroligins, ROCK2, and SLC12a5 (KCC2), and show  
10 that *ASTN2* removes surface proteins by endocytosis. Further, *ASTN2* is found in a  
11 subset of vesicles along the entire endosomal pathway and links to the endosomal  
12 trafficking machinery via binding to the adaptor protein AP-2 and the vacuolar  
13 protein-sorting-associated protein 36 (VPS36). Importantly, consistent with a role  
14 in regulating the surface expression of key synaptic proteins, while conditional  
15 overexpression of *ASTN2* in PCs increases synaptic strength, *ASTN2* with deletion of  
16 the FNIII domain, the region commonly disrupted by CNVs in patients including the  
17 family presented here, is inefficient at changing synaptic activity. At the molecular  
18 level, overexpression of *ASTN2* results in reduced protein levels of its synaptic  
19 binding partners. Our study identifies *ASTN2* as a molecule that modulates the  
20 composition of the surface membrane proteome. We propose that the intra-genic  
21 *ASTN2* CNVs in patients result in misregulation of surface protein turnover, which is  
22 crucial for normal synaptic activity.

## 1 **Results**

### 2 *Paternally inherited ASTN2 CNV in a family with ASD, ID, and speech and language* 3 *delay*

4           Single nucleotide polymorphism (SNP) array genetic testing of a child  
5 presented at 19 months of age, identified a 171 kb duplication at 9q33.1, affecting  
6 exons 16-19 of *ASTN2* (personal communication, L. Jamal, Johns Hopkins). The CNV  
7 was present in the father and 3/5 children, indicating a paternally inherited  
8 heterozygous duplication. The children displayed a range of NDDs (Table S1)  
9 including ID and ASD. Two features in particular stood out in the affected children,  
10 namely learning difficulty and speech and language delay regardless of other  
11 diagnoses.

12           To investigate how the duplication of exons 16-19, which code for part of the  
13 MACPF and the FNIII domains of *ASTN2*, affects *ASTN2* expression, we obtained  
14 peripheral blood mononuclear cells (PBMCs) from patients, where *ASTN2*  
15 expression was detected in the CD4+ T cell fraction (Fig. 1a). The duplication was  
16 predicted to either result in an mRNA encoding an intact MACPF domain but a  
17 truncated FNIII domain due to the creation of a frameshift stop codon (termed JDUP,  
18 Fig. S2), or nonsense-mediated decay of the mRNA. In CD4+ T cells isolated from 2/3  
19 of the boys with the *ASTN2* CNV as well as the father, *ASTN2* was reduced by ~30-  
20 50% compared to controls including the mother (Fig. 1b). We detected two protein  
21 bands, one of which is absent in the mouse, both of which were ~50% lower in  
22 patients compared to controls by Western blot (Fig. 1c). While the mRNA  
23 quantification (Fig. 1b) suggests that the majority of the duplicated mRNA

1 undergoes nonsense-mediated decay, we cannot exclude that low levels of the  
2 truncated protein (termed JDUP) is expressed in patients, as the antibody used does  
3 not recognize JDUP (verified with a deletion construct, data not shown).

4  
5 In the DECIPHER database, which currently contains clinical and genetic  
6 information on 11,887 NDD patients, ID is reported in 11/18 (61%) patients with  
7 *ASTN2* CNVs (both deletions and duplications); a slightly higher rate of occurrence  
8 than in the overall NDD population (6735/11887, 57%). Speech and language delay  
9 was reported in 5/18 *ASTN2* CNV patients (28%), also above the rate observed in  
10 the overall NDD population (2505/11887, 21%). In relation to other genes that are  
11 highly associated with either ID or ASD/ID, *ASTN2* CNV patients fell above the  
12 median for ID among the investigated genes (above 6/8 ASD-associated genes and  
13 within the range of the ID genes), and on the median among these genes for speech  
14 and language delay (Fig. S1b). Thus, ID is the single most commonly occurring  
15 feature in patients with *ASTN2* CNVs (both deletions and duplications) followed by  
16 speech and language delay, including in patients diagnosed with ASD.

#### 17 *ASTN2 protein localization in the juvenile brain*

18 To investigate the function of *ASTN2*, we first analysed its subcellular  
19 localization in the mouse cerebellum; the strongest site of expression in the brain  
20 (1). Immunohistochemistry (for antibody validation see Fig. S3a, b and (1)) in the  
21 juvenile mouse cerebellum showed *ASTN2* in granule cells (GC), in the molecular  
22 layer, and at higher levels in PCs (Fig. 2a). In PCs, punctate labeling was detected in  
23 the PC body, in the dendritic stalk, and in dendrites (Fig. 2c-e). Immuno-EM labeling

1 revealed that ASTN2 localized to membranes in the ER, and small round trafficking  
2 vesicles near the ER, the Golgi, and the plasma membrane of PCs (Fig. 2g). ASTN2  
3 also localized to endocytic vesicles (Fig. 2g-i), and autophagosomes (Fig. 2g, j). A  
4 subset of dendritic spines, mostly in proximal regions of PCs, was positive for  
5 ASTN2. In labeled spines, ASTN2 localized to membranes near, but not directly at,  
6 the postsynaptic density (Fig. 2l-o). Co-labeling of ASTN2 with recycling (Rab4),  
7 early (Rab5), and late (Rab7) endosomal markers revealed that a small subset of  
8 ASTN2 puncta localize to all these fractions of the endocytic pathway in the juvenile  
9 cerebellum (Fig. S4). The punctate expression pattern of ASTN2 and its localization  
10 to membranes of endocytic and autophagocytic vesicles suggests involvement in  
11 trafficking and its presence proximal to synapses in post-migratory neurons raised  
12 the possibility that ASTN2 is involved in synaptic function.

13 *ASTN2 binds to and reduces the surface expression of synaptic proteins by endocytosis*

14 To investigate whether ASTN2 has a synaptic role, we first examined if it  
15 binds to key adhesion proteins known to regulate PC synaptic function. Co-immuno  
16 precipitation (IP) experiments revealed that ASTN2 interacts with members of the  
17 Neuroligin family, as does the truncated JDUP version (Fig. 3a). By Western blot,  
18 NLGN1/2 interacted more strongly with ASTN2 than with JDUP, while NLGN3/4  
19 interacted more strongly with JDUP than with ASTN2. Thus ASTN2 binds to  
20 Neuroligins and the presence of the FNIII domain differentially impacts the affinity  
21 of ASTN2 for different binding partners.

22

1           To investigate whether ASTN2 regulates the surface expression of  
2   Neuroligins, we quantified the surface expression of NLGN1-EGFP by live  
3   immunolabeling and flow cytometry in the presence and absence of ASTN2 and  
4   found a reduction in surface NLGN1 in cells co-transfected with ASTN2 as compared  
5   to cells without (49% versus 67%, Fig. 3b). This reduction was even more marked  
6   for NLGN3, in the presence of ASTN2 (Fig. 3b, 23% versus 5%). However, ASTN2 did  
7   not reduce the surface expression of glycosylphosphatidylinositol (GPI)-anchored  
8   surface EGFP (Fig. 3b). Hence ASTN2 specifically removes Neuroligins from the  
9   surface of HEK cells due to protein-protein interaction.

10

11           We then examined whether ASTN2 expression reduced surface NLGN1 also  
12   in neurons. For these experiments we chose to target GCs, which are far more  
13   numerous than PCs and also express ASTN2, and together with PCs, are the main  
14   neuronal subtype in the cerebellum. We used overexpression to disrupt the  
15   stoichiometry of ASTN2 protein complexes, as knockdown of ASTN2 protein was  
16   not possible in neurons (Fig. S3), possibly due to the extremely long half-life of  
17   ASTNs in the brain (17). As seen in HEK293T cells, GCs grown in culture for 14 days  
18   and co-transfected with *Nlgn1* and *Astn2* had reduced surface expression of NLGN1  
19   compared to controls by live immunolabeling of surface NLGN1-EGFP (Fig. S5a, b).  
20   To investigate whether the reduction in surface expression is due to endocytosis  
21   versus potential changes in surface insertion of NLGN1 upon expression from  
22   plasmids, we carried out pulse-chase labeling of surface NLGN1-EGFP. GCs that co-  
23   expressed NLGN1 and ASTN2 had higher levels of internalized NLGN1 after a 20 min



1 chase than GCs that expressed NLGN1 and a control plasmid (Fig. 3c, d). Thus,  
2 ASTN2 interacts with several key synaptic adhesion proteins and can reduce their  
3 surface expression in neurons and HEK cells by endocytosis.

4 *ASTN2 binds a number of proteins suggestive of trafficking of multiple protein*  
5 *complexes in neurons*

6 To identify additional ASTN2 binding partners in an unbiased manner, we  
7 carried out IP of ASTN2 from the juvenile (P22-28) mouse cerebellum followed by  
8 mass spec analysis. An initial round of experiments with duplicate samples was  
9 followed by a second experiment with more stringent washes and the inclusion of a  
10 further negative control in which the ASTN2 antibody was affinity removed from the  
11 antisera (Fig. S6a). The combined experiments identified 466 proteins enriched in  
12 the ASTN2 IP compared to IgG or the depleted ASTN2 sera samples (Table S2).  
13 Further refinement of the list to only include proteins with at least 3 peptide hits  
14 that were  $\geq 1.5$  fold enriched in the ASTN2 IP versus the IgG or the depleted anti-  
15 ASTN2 sera yielded 57 proteins (Fig. 4a). We identified AP-2, an adaptor protein in  
16 Clathrin-mediated endocytosis from the plasma membrane, and VPS36, found on  
17 sorting endosomes. We also identified multiple proteins involved in synaptic form  
18 and function such as C1q, shown to mediate synaptic pruning (18), OLFM1/3, which  
19 form complexes with AMPA receptors (19) and were recently identified as ASD  
20 candidates (20), ROCK2, a Rho-kinase which regulates spine morphology and  
21 synaptic activity through regulation of the cytoskeleton (21), and SLC12a5 (KCC2), a  
22 potassium/chloride co-transporter that regulates the intracellular Chloride ion  
23 gradient as well as dendritic spine morphogenesis (22, 23), and is also implicated in

1 ASD (24-26). Thus, ASTN2 interacts with multiple proteins that regulate synaptic  
2 activity. We confirmed these interactions by co-IP and Western blot in HEK 293T  
3 cells (Fig. 4c, Fig. S6b). Furthermore we detected co-IP of ASTN2/ROCK2/AP2 (Fig.  
4 4d) and ASTN2/NGLN2/AP2 (Fig. S6c) *in vivo*. Functional enrichment analysis of the  
5 proteins identified categories (Fig. 4b) such as phagosome, endocytosis, synapse,  
6 microtubule-associated processes, and t-RNA splicing ligase complex (not  
7 investigated further here). A number of the interacting proteins identified are, like  
8 ASTN2, implicated in ASD pathogenesis (asterisks, Fig. 4b). Taken together, our  
9 IP/mass spec experiments show that ASTN2 binds to proteins involved in vesicle  
10 trafficking and synaptic function including synaptic pruning proteins, ion  
11 transporters, accessory proteins to ligand-gated ion channels, and proteins involved  
12 in cytoskeletal rearrangements, suggesting that ASTN2 possibly promotes the  
13 trafficking of multiple surface proteins.

#### 14 *ASTN2, but not the FNIII truncation, induces degradation of surface proteins*

15 In our flow cytometry analyses (Fig. 3b), an increase in the percentage of  
16 cells that did not express NLGN1 or 3 in the presence of ASTN2 was observed  
17 (bottom left quadrants of graphs), as opposed to an increase in cells that expressed  
18 NLGN1/3 internally but not on the cell surface (bottom right quadrants), suggesting  
19 that ASTN2 not only internalizes proteins but also induces degradation. Indeed, we  
20 detected reduced expression of the identified synaptic binding partners (NLGN1-4,  
21 SLC12a5, OLFM1, Fig. 5a, b), but no change in the levels of the adaptor protein AP-2  
22 or GAPDH (Fig. 4c, 5a, b) upon ASTN2 overexpression compared to controls by  
23 Western blot. Importantly, while co-expression of NLGN1 or SLC12a5 with ASTN2

1 resulted in reduced levels of both, this reduction was much less marked upon co-  
2 expression with JDUP (Fig. 5b). Thus, co-expression of ASTN2 but not the JDUP  
3 truncation markedly reduced protein levels. Moreover, shRNA-mediated  
4 knockdown of ASTN2 resulted in similar levels of NLGN1 and SLC12a5 to cells  
5 without ASTN2 protein or cells with JDUP, suggesting that the reduction the levels of  
6 ASTN2 binding partners only occurs in the presence of intact ASTN2. Together, our  
7 data suggest that ASTN2 promotes the internalization and degradation of surface  
8 proteins.

9       To further examine the idea that ASTN2 promotes protein degradation, we  
10 searched the top 57 protein hits identified by mass spec to see if any membrane  
11 proteins identified were also found in CD4+ patient T-cells, where ASTN2 levels are  
12 reduced. Among the 57, only ROCK2 is expressed in neurons as well as in T-cells.  
13 Although like ASTN2, ROCK2 levels were variable among patients, they were on  
14 average higher in patients compared to controls (Fig. 5c). The expression level of the  
15 lower ASTN2 band (Fig. 1c bottom right graph) inversely correlated with ROCK2  
16 levels among patients. Together, our data suggest that ASTN2 plays a fundamental  
17 role in modulating the dynamic localization and degradation of several protein  
18 complexes in multiple cell types.

### 19 *ASTN2 modulates synaptic activity*

20       To investigate whether manipulation of ASTN2 levels impacts synaptic  
21 function in the cerebellum, we generated conditional lentiviruses expressing either  
22 the full length EGFP-tagged ASTN2 (pFU-cASTN2-EGFP) or a truncated version  
23 (pFU-cJDUP-EGFP) lacking the FNIII domain. Overexpression approaches have

1 generally been reported to be more sensitive in revealing roles for adhesion  
2 molecules (27) and proteins in multimeric complexes during synaptogenesis, due to  
3 the disruption of the stoichiometry of complexes and unmasking of functions  
4 otherwise compensated for by homologous proteins in loss of function approaches  
5 (28). Viruses were stereotactically injected *in vivo* into *Pcp2-Cre+* cerebella at P0-2  
6 (Fig. 6a) to target PCs. EGFP expression, restricted by *Pcp2-Cre* to PCs only, was  
7 observed 3-4 weeks after viral injection (Fig. 6b). Interestingly, ASTN2-EGFP, but  
8 not JDUP-EGFP expression, resulted in mislocalization of some PCs to ectopic  
9 locations within the internal granule cell layer and in the white matter (Fig. 6b and  
10 Fig. S7).

11

12 To test the properties of intrinsic excitability and synaptic transmission onto  
13 PCs that expressed either ASTN2-EGFP or JDUP-EGFP, we performed whole-cell  
14 electrophysiological recordings in acute brain slices from injected *Pcp2-Cre+*  
15 animals 3-4 weeks after viral injections (P21-35). Control recordings were  
16 performed on EGFP-negative PCs from *Pcp2-Cre<sup>-/-</sup>* littermates injected with the  
17 same conditional viruses. Miniature excitatory/inhibitory postsynaptic currents  
18 (mEPSCs/mIPSCs) were recorded to assess non-evoked, quantal synaptic input,  
19 primarily from the parallel fibers (mEPSCs) and the inhibitory stellate and basket  
20 cells (mIPSCs). In PCs expressing ASTN2-EGFP, we found a significant increase in  
21 both mIPSC amplitude ( $\Delta_{\max}=25.2\%$ ) and frequency ( $\Delta_{\max}=13.8\%$ ) and an increase  
22 in mEPSC amplitude ( $\Delta_{\max}=21.5\%$ ) in the same PCs. There was no change in the  
23 frequency of mEPSCs ( $\Delta_{\max}=5.9\%$ , Fig. 6c, d). In PCs expressing JDUP-EGFP, there

1 was a much less marked increase in mIPSC amplitudes (Fig. 6c, d,  $\Delta_{\max}$  =11.4%) and  
2 no change in frequency ( $\Delta_{\max}$  =2.3%). In addition, we observed a less marked  
3 increase in mEPSC amplitudes ( $\Delta_{\max}$  =11.9%) but a significant decrease in mEPSC  
4 frequency ( $\Delta_{\max}$  =13.5%). These results indicate changes in the synaptic strength of  
5 PCs, with the strongest effect on mIPSCs upon ASTN2-EGFP expression.

6  
7 We also tested evoked excitation from parallel fibers, and found that the  
8 paired pulse ratio was unchanged, suggesting no difference in presynaptic release  
9 probability (Fig. 6e). In addition, we did not observe any differences in the  
10 spontaneous spiking of either ASTN2-EGFP or JDUP-EGFP expressing cells as  
11 measured by non-invasive cell-attached recordings (Fig. 6f). These results suggest  
12 that ASTN2 overexpression increases synaptic strength primarily by altering the  
13 properties of the postsynaptic membrane, rather than the intrinsic excitability of  
14 PCs or presynaptic release dynamics. Importantly, we did not observe the same  
15 degree of changes with expression of JDUP-EGFP as we did with ASTN2-EGFP.  
16 Finally, comparison of NLGN2 expression, which is the most highly expressed of the  
17 Neuroligins in the cerebellum (29), in the soma of targeted PCs revealed a  
18 significant decrease in ASTN2-EGFP PCs compared to JDUP-EGFP or control PCs  
19 from *Pcp2-Cre*<sup>-/-</sup> cerebella injected with the same conditional viruses (Fig. 5d),  
20 further corroborating our earlier findings that ASTN2 overexpression induces  
21 degradation of synaptic binding partners.

## 1 **Discussion**

2           Using immuno-gold EM, biochemical, electrophysiological, and functional  
3 assays we demonstrate a novel role for ASTN2 in controlling protein trafficking and  
4 homeostasis in synaptic function. We detect ASTN2 in dendritic spines of neurons  
5 and in trafficking vesicles, and identify binding to several synaptic as well as  
6 trafficking proteins. Consistent with this interpretation, ASTN2 binds the Clathrin  
7 adapter AP-2. In postmitotic PCs, the sole output neuron of the cerebellar cortex and  
8 a cell type with documented loss in ASD patients (14), overexpression of ASTN2  
9 increased synaptic strength and decreased protein levels of synaptic binding  
10 partners. Our analyses suggest a role for ASTN2 in controlling surface membrane  
11 protein dynamics and underscore the contribution of impairment in protein  
12 trafficking to neurodevelopmental brain disorders.

13

14           The results reported here compared the effect of ASTN2 overexpression with  
15 that of a truncated form lacking the FNIII domain. These experiments were  
16 informative in showing that removal of the FNIII domain interfered with the ability  
17 of ASTN2 to promote protein degradation, but not its ability to interact with binding  
18 partners. Overexpression in cell types that normally express ASTN2 provided a  
19 powerful means to study the consequences of disrupting the stoichiometry of  
20 ASTN2 in its native protein complexes. It should be noted that knock-down of  
21 ASTN2 protein was achieved in HEK cells but not in neurons (Fig. S3) possibly due  
22 to the formation of protein complexes in neurons, which promote the perdurance of  
23 the protein. Indeed, two pulse-chase studies examining protein turnover in the

1 mouse brain found that ASTN1, the homologue of ASTN2, is present even after 1  
2 month following *in vivo* isotopic labeling (17, 30). It is therefore likely that ASTN2 is  
3 also extremely long-lived.

4  
5 The interpretation that ASTN2 is a long-lived protein is also consistent with  
6 the reported stability of ASTN2 protein at pH 4.0 (31), which would allow it to  
7 traffic binding partners through the lower pH endosomal compartments of the  
8 endo/lysosomal system. In line with a trafficking role, the ASTN2 protein sequence  
9 (Fig. S2) contains tyrosine-based sorting signals recognized by the adaptor proteins  
10 AP1-4, and a dileucine-based signal recognized by Golgi-localized Y-ear containing  
11 ARF-binding (GGA) proteins (localized to endosomes), also involved in endosomal  
12 trafficking (32), as well as lysosomal sorting signals like those found in lysosomal  
13 membrane proteins LAMP1/LAMP2. These signals are not only recognized at the  
14 plasma membrane, but also at sorting stations such as the endosomes (32),  
15 suggesting that ASTN2 is likely involved in multiple steps of endo/lysosomal  
16 trafficking and not just at the surface membrane. This is consistent with our EM  
17 data, which showed that ASTN2 localizes to membranes and vesicles throughout the  
18 cell soma (Fig. 2d), and with our co-localization experiment with endosomal  
19 markers where ASTN2 was found in a small fraction of early as well as late  
20 endosomes (Fig. S4). Furthermore, our mass spec and biochemical data show that  
21 ASTN2 binds various endosomal trafficking and sorting proteins including AP-2 and  
22 VPS36 (part of the ESCRTII complex) and controls the surface removal and  
23 degradation of a number of synaptic proteins. Finally, our EM analysis showed

1 ASTN2 also on autophagosomes. As a large body of work shows that autophagic  
2 vesicles fuse with endosomes and lysosomes, (33, 34), it will be interesting to  
3 further examine the involvement of ASTN2 in the interplay between autophagy and  
4 endo/lysosomal trafficking. We note that our findings do not exclude a role for  
5 ASTN2 in protein degradation pathways other than the endo/lysosomal system.

6  
7 In addition to components of vesicle trafficking, the identification of  
8 interactions with multiple proteins involved in synaptic pruning, C1q (18), AMPA  
9 receptor accessory proteins, OLFM1/3 (19), ion transport, SLC12a5 (22), and  
10 proteins regulating synaptic adhesion and activity, ROCK2 (21) and NLGN1-4 (29),  
11 suggest that ASTN2 may modulate the composition of multiple protein complexes  
12 which impact synaptic form and function. In PCs, the sum of these interactions is  
13 increased postsynaptic activity upon ASTN2 overexpression. We speculate that the  
14 ability of ASTN2 to remove surface proteins also caused the mislocalization of PCs *in*  
15 *vivo* (Fig. S7). The mechanisms that keep PCs in place however are not fully  
16 understood.

17  
18 Of note, a previous proteomic study of synaptosomal fractions prepared from  
19 mouse and human brains detected ASTN2 (35), corroborating our finding that  
20 ASTN2 is indeed present near synapses. The largest synaptic activity changes  
21 observed upon ASTN2 overexpression were increased mIPSC frequency and  
22 amplitude. Increases in mini frequency are commonly associated with increased  
23 numbers of synapses, while increases in mini amplitude often reflect increased



1 numbers of postsynaptic receptors. However, other mechanisms could also  
2 contribute, such as alterations in single channel conductance, receptor  
3 desensitization, changes in intracellular ion concentrations due to alterations in  
4 plasma membrane ion transporters, or fine-scale structural changes (36). Given the  
5 finding that ASTN2 internalizes synaptic and cell surface proteins, we favor the  
6 second set of scenarios whereby removal of proteins accessory to channels, such as  
7 OLFM1/3 and NLGN2, or the ion transporter SLC12a5, change ligand-gated channel  
8 mediated responses. Excessive removal and degradation of accessory proteins could  
9 also leave receptors stranded on the cell surface, with their normal activity  
10 disrupted. Moreover, reduced levels of SLC12a5 could result in an increase in both  
11 mEPSCs and mIPSCs as reported by a study in the hippocampus of SLC12a5  
12 deficient mice (37). It should be noted that although NLGNs were not identified by  
13 IP/mass spec, which samples the most abundant and stable interactions, two  
14 NLGN1/3 peptides were identified with a targeted mass spec approach (data not  
15 shown). It is possible that other transient interactions were not detected by our  
16 method and would need to be investigated in a candidate protein approach. Overall,  
17 our data suggest that as the primary role of ASTN2 appears to be in trafficking of an  
18 array of synaptic proteins, manipulations of ASTN2 can result in diverse synaptic  
19 modifications including changes in postsynaptic receptor expression and synaptic  
20 strength depending on context. Further studies on the effect of loss of ASTN2 await  
21 development of a genetic mouse model.

22

1            Interestingly, the JDUP truncation did not abolish, but rather altered the  
2 interaction of ASTN2 with its binding partners, increasing its affinity for some  
3 (NLGN3/4) while decreasing it for others (NLGN1/2, Fig. 3a). These differences in  
4 affinities could underlie the differing effects on mIPSC and mEPSC events induced by  
5 ASTN2 versus JDUP (Fig. 6). While ASTN2 clearly interacts with and regulates the  
6 availability of a number of proteins, a systems level analysis using advanced live cell  
7 imaging combined with single molecule tracking of multiple proteins in action is  
8 needed to understand the combined effects of manipulation of an ASTN2-mediated  
9 trafficking pathway.

10

11            As reported here and elsewhere, patients with *ASTN2* CNVs can manifest a  
12 spectrum of NDD phenotypes, even within the same family (Table S1). Our analysis  
13 of the association of *ASTN2* CNVs with specific features commonly reported in such  
14 patients, revealed a high level of association with ID and delayed speech and  
15 language. Based on our findings that an ASTN2-mediated protein trafficking  
16 pathway modulates synaptic strength, we propose that *ASTN2* CNVs (truncating  
17 duplications and deletions) in NDD patients, cause an accumulation of surface  
18 proteins. It appears critical for neurons to respond to inputs and modify their  
19 surface proteome in a rapid fashion. Activity-dependent changes in gene expression  
20 have been well documented, but more rapid changes in the composition of the  
21 synaptic proteome, through protein trafficking and degradation, would indeed offer  
22 quicker means to adjust to such inputs. Interestingly, *Astn2* levels have been  
23 reported to change in response to stress in the CA3 region of the hippocampus in

1 mice (38), suggesting the possibility that ASTN2 may modulate the surface  
2 proteome in response to activity in neurons.

3

4       ASTN2 is unusual in that it is so abundantly expressed in the cerebellum  
5 compared with other brain regions. Although the contribution of the cerebellum to  
6 ASD, ID, or speech and language development is poorly understood, neuroimaging  
7 studies show both functional and neuroanatomical evidence for the critical  
8 importance of the cerebellum (39-41). Computational studies mapping the spatio-  
9 temporal co-expression of ASD-associated genes, including ASTN2, show that  
10 cortical projection neurons (layer 5/6) and the cerebellar cortex are the two most  
11 prevalent sites of ASD gene co-expression (42, 43). Furthermore, long term  
12 depression (LTD), which is thought to be essential for many forms of cerebellar  
13 learning, is altered at parallel fiber-PC synapses in mice with targeted disruptions of  
14 several ASD-associated genes (16, 44-47). The present findings suggest that ASTN2  
15 is a key regulator of dynamic trafficking of synaptic proteins in the cerebellum and  
16 lend support to the idea that aberrant regulation of protein homeostasis is a  
17 contributing cause of complex neurodevelopmental disorders such as ASD and ID  
18 (48).

## 19 **Methods**

20 *Human subjects:* Patient clinical information and PBMCs were collected at Kennedy  
21 Krieger Institute (Baltimore) upon informed consent from all subjects. This study  
22 was approved by IRB boards of the Kennedy Krieger Institute (Baltimore) and The  
23 Rockefeller University (New York).

1 *Mice:* C57Bl/6J mice (Jackson Laboratory) were used unless stated otherwise. All  
2 procedures were performed according to guidelines approved by the Rockefeller  
3 University Institutional Animal Care and Use Committee. Both males and females  
4 were used for all studies and were randomly allocated to control and test groups.  
5 *Reverse transcription polymerase chain reaction (RT-PCR) and quantitative (q) RT-*  
6 *PCR:* mRNA was extracted using the AllPrep DNA/RNA/Protein Mini Kit (Qiagen)  
7 and cDNA transcribed with the Transcription First Strand cDNA Synthesis Kit  
8 (Roche) according to the manufacturer's description. RT-PCR and qRT-PCR were  
9 carried out according to standard procedures. See supplementary methods.  
10 *Primary cell and cell line culture:* HEK 293T/17 cells (ATCC#Crl-11268) were grown  
11 at 37°C/5% CO<sub>2</sub> in DMEM/F12, 10% heat inactivated Fetal Bovine Serum (FBS),  
12 4mM L-glutamine, 100U/ml Penicillin/Streptomycin (all from Gibco). Mixed  
13 cerebellar cultures were prepared from P6-8 pups and cultured in serum containing  
14 medium as previously described (1, 49). Half of the medium was replaced with fresh  
15 medium without serum every 3-4 days for the duration of culture. Both HEK cells  
16 and primary granule cells (at DIV14) were transfected using Lipofectamine 2000  
17 (Invitrogen) according to the manufacturer's description. PBMCs from human  
18 subjects were isolated using BD Vacutainer™ CPT™ Tubes (BD Biosciences  
19 #362753). 10 x 10<sup>6</sup> cells were first plated in T cell medium (RPMI-1640, 10% FBS,  
20 2 mM Glutamine, 100 U/ml Penicillin/Streptomycin, 10 μM HEPES) for 3 hrs,  
21 allowing monocytes to attach to the plate and be discarded. CD4<sup>+</sup> cells were then  
22 sorted by MACS Separation using CD4 MicroBeads (human) and MS columns  
23 (Miltenyi Biotec) according to the manufacturer's descriptions and expanded in T

1 cell medium containing 30 U/ml IL2 (Peprotech #200-02) and CD3/CD28 beads  
2 (Dynabeads #11161D) according to the manufacturer's description. Media change  
3 (T cell medium containing IL2) was performed every two days and cells were  
4 collected at DIV 8 for mRNA and protein analysis.

5 *Immunohisto/cytochemistry*: Mice P15 or older were fixed by perfusion with 4% PFA  
6 and sectioned sagittally at 50 $\mu$ m (Leica Vibratome). *In vitro* cultured cells  
7 (described above) were grown on glass coverslips (no 1.5 thickness, Fisher  
8 Scientific) and fixed for 15 minutes at room temperature in 4% PFA.

9 Immunohistochemistry was carried out according to standard protocols. See  
10 supplementary methods.

11 *Antibodies used for immunohistochemistry, immunoprecipitation and Western blot*:  
12 see supplementary methods.

13 *cDNA/ShRNA constructs*: see supplementary methods.

14 *Knockdown of ASTN2*: HEK cells were transfected, as described earlier, with  
15 plasmids expressing the *Astn2* cDNA alone or together with shRNA and scrambled  
16 constructs. Two days later, cells were processed for immunohistochemistry and  
17 Western blot as described earlier. For knockdown in neurons see supplementary  
18 methods.

19 *Pre-embedding nanogold immunolabeling and electron microscopy*: P28 mice were  
20 perfusion fixed with 4% PFA. 50 $\mu$ m sagittal vibratome sections were prepared and  
21 incubated in blocking solution (3% BSA, 0.1% saponin in 0.1M sodium cacodylate  
22 buffer, pH7.4) for 2 hr at room temperature, followed by incubation in anti-ASTN2  
23 antibody in blocking solution for 48 hrs at 4°C. After washing (4x 1 hr in sodium

1 cacodylate buffer), the sections were incubated for 2 hrs at room temperature with  
2 secondary antibody (1:100, Nanoprobes- Nanogold, anti-Rabbit: 2003), washed 4x 1  
3 hr in 0.1% saponin in 0.1M sodium cacodylate buffer, pH 7.4 and then fixed in 2.5%  
4 glutaraldehyde (Sigma) overnight at 4°C. The sections underwent silver  
5 enhancement (HQ Silver Enhancement 2012, Nanoprobes), and Gold Toning using a  
6 0.1% solution of gold chloride (HT1004, Sigma) according to the manufacturer's  
7 description. The tissue was post-fixed with 1% osmium tetroxide for 1 hour on ice.  
8 Sections underwent en bloc staining with 1% uranyl acetate for 30 min, dehydrated  
9 in a graded series of ethanol, incubated for 10 minutes in acetone, infiltrated with  
10 Eponate 12™ Embedding Kit (Ted Pella), and polymerized for 48 hrs at 60°C. 70nm  
11 ultrathin sections were imaged on a JEOL JEM-100CX at 80kV and a digital imaging  
12 system (XR41-C, Advanced Microscopy Technology Corp, Woburn, MA). For  
13 negative controls, sections were processed as described but with omission of the  
14 primary antibody.

15 *Immunoprecipitation, intracellular crosslinking of proteins, depletion of ASTN2*  
16 *antisera and Western blot:* For *in vitro* IPs, proteins from transfected HEK 293T cells  
17 were extracted in either RIPA buffer (Thermo Scientific) or in a customized IP buffer  
18 (50 mM Tris pH 7.4, 200 mM NaCl, 5 mM MgCl<sub>2</sub>, 5 mM NaF, 1.5% Octyl β-D-  
19 glucopyranoside (abcam), 1x Protease Inhibitor Cocktail, 10U Benzonase Nuclease,  
20 Sigma). For *in vivo* IPs, proteins were extracted from P22-28 cerebella using the  
21 customized IP buffer (above). 1.8 mg (*in vivo*) or 0.5 mg (*in vitro*) protein inputs  
22 were used to carry out overnight IPs according to standard protocols using  
23 Dynabeads Protein G (Invitrogen) cross-linked with antibodies using Bis-

1 sulfosuccinimidyl suberate (BS3) cross-linking according to the manufacturer's  
2 description (Thermo Scientific). As controls, either normal IgG from the same  
3 species as the antibody (Santa Cruz) or an "anti-ASTN2 depleted antisera" was used.  
4 The anti-ASTN2 depleted antisera was prepared by incubating the anti-ASTN2  
5 antibody with N-terminal biotinylated peptide against which the antibody had been  
6 raised (KITCEEKMVSMARNTYGETKGR) in the customized IP buffer. The antibody-  
7 peptide mix was then pulled out with Dynabeads MyOne Streptavidin T1 beads  
8 (Invitrogen) and the volume containing the antisera depleted of ASTN2 antibody  
9 was cross-linked to Dynabeads Protein G for use as negative control. Depletion of  
10 anti-ASTN2 antibody was confirmed by Western blot analysis on cerebellar lysates  
11 (Figure S6a). Intracellular cross-linking of proteins was carried out prior to some  
12 IPs (as indicated in main text) with disuccinimidyl suberate DSS (Thermo Scientific)  
13 according to the manufacturer's descriptions. Western blots were carried out  
14 according to standard protocols using SDS-PAGE gels (Fisher) and Immobilon-P  
15 transfer membranes (Millipore). Blots were developed using an ECL Western  
16 Blotting Kit (GE Healthcare) or SuperSignal West Pico kit (Thermo Scientific) and  
17 exposed to X-ray film (Kodak).

18 *Mass spectrometry:* IPs were prepared as described earlier using 1.8 mg protein  
19 input from whole cerebellar lysates (P22-28) with antibody cross-linked beads.  
20 Immuno-precipitated proteins were eluted with 8M urea (GE Healthcare) in 0.1 M  
21 ammonium bicarbonate (Sigma) and 10 mM DTT (Sigma). Cysteines were alkylated  
22 with iodoacetamide (Sigma). Samples were then diluted below 4 M urea before  
23 digesting with LysC (Waco Chemicals) for 6 hrs, after which urea was diluted below

1 2 M for overnight trypsin (Promega) digestion. Peptides were desalted by StaGE tips  
2 and processed for nano LC-MS/MS in data-dependent mode (Dionex U3000 coupled  
3 to a QExactive or QExactive Plus mass spectrometer, ThermoFisher Scientific).  
4 Generated LC-MS/MS data were queried against Uniprot's complete Mouse  
5 Proteome (downloaded July 2014) concatenated with common contaminants, and  
6 peptides were identified and quantified using Proteome Discoverer 1.4  
7 (ThermoScientific) and Mascot 2.5.1 (Matrix Sciences) with fully tryptic restraints  
8 (Trypsin/P) and up to 3 missed cleavages with Protein N-term acetylation and  
9 methionine oxidation as variable modifications and cysteine carbamidomethylation  
10 as a stable modification. Peptide matches required 5 ppm accuracy in MS1 and 20  
11 mmu in MS2, with a 1% FDR filter using Percolator (55). To create the list of 466  
12 identified proteins, all proteins that were only present in IgG samples were filtered  
13 out as were proteins that showed enrichment in the IgG control over the ASTN2 IP  
14 in the most stringently washed experiment (III). The most stringent list of 57  
15 proteins (Fig. 4) was created by including only proteins with at least 3 peptide hits  
16 that were  $\geq 1.5$  fold enriched in the combined ASTN2 I+II IPs/ I+II IgG IPs or in  
17 ASTN2 III IP/ depleted anti-ASTN2 sera. Functional enrichment analysis was carried  
18 out using STRING (v10.0, <http://string-db.org/>).  
19 *Flow cytometry:* Transfected HEK 293T cells were harvested in 1 mM EDTA in PBS.  
20 The surface fraction of GFP-linked surface proteins was immuno-labeled (live) with  
21 rabbit anti-GFP followed by Alexa-647 anti-rabbit and cells were stained with  
22 Propidium Iodide (Sigma-Aldrich) for dead cell exclusion. Flow cytometry analysis  
23 (BD Accuri C6, BD Biosciences) was carried out using 488 nm and 640 nm lasers and



1 the CFlow Sampler software (BD Biosciences). A total of 20,000 single viable cells,  
2 identified by size and lack of Propidium Iodide staining, were analyzed per  
3 condition (resulted in approximately 100,000 events per condition). Gates were set  
4 using non-transfected control cells and cells expressing cytosolic GFP ( $\alpha$ -tubulin-  
5 GFP), which were processed for live GFP labeling as described above. Data were  
6 analyzed by FlowJo v.9.3.3 (TreeStar Inc., Ashland, OR).

7 *Surface and pulse-chase labeling in neurons:* DIV14 mixed cerebellar cultures  
8 (prepared as described earlier) were transfected with either “Nlgn1-HA-YFP +  
9 Astn2-EGFP” or “Nlgn1-HA-YFP + EGFP” plasmids using Liofectamine 2000. On  
10 DIV17, cells were incubated with anti-GFP (1:500) diluted in culture medium  
11 containing 10 mM HEPES (Sigma) at 4°C for 20 min, followed by 2x washes with  
12 medium + 10 mM HEPES on ice to prevent endocytosis. For surface labeling  
13 experiments (Fig. S5), cells were fixed and processed as previously described. For  
14 pulse-chase experiments (Fig. 3) cells were incubated in fresh medium for a 20 min  
15 chase period at 35°C/5% CO<sub>2</sub>. Cells were then incubated with anti-rabbit Alexa-633  
16 (1:300) for 30 min at 4°C to label all pulsed NLGN1-HA-YFP left on the cell surface,  
17 followed by 2x washes in medium on ice to wash away unbound antibodies. The  
18 cells were then fixed and processed as described earlier to detect internalized (anti-  
19 rabbit Alexa-555 secondary) and total (mouse anti-HA primary followed by anti-  
20 mouse Alexa 405 secondary) protein. Control experiments were carried out to  
21 ensure that surface labeling did not occur with the GFP antibody on cells that  
22 expressed EGFP or ASTN2-EGFP only, as neither protein is exposed on the surface

1 membrane, while the YFP tag of NLGN1-HA-YFP is positioned outside the plasma  
2 membrane and hence detected by live labeling.

3 *Imaging:* Images were acquired using an inverted Zeiss LSM 880 NLO laser scanning  
4 confocal microscope with a Plan-Apochromat 40x/1.4 NA objective oil immersion  
5 lens and 2.8 x digital zoom. For the lower power image in Fig. 2a a Plan-Apochromat  
6 10x/0.45 NA lens was used. Images were acquired by setting the same gain and  
7 offset thresholds for all images per experiment and over/underexposure of signal  
8 was avoided. Images were quantified in ImageJ (version 2.0.0-rc-38/1.50b) unless  
9 stated otherwise.

10 *Virus production and in vivo viral injections:* VSV-G pseudo-typed lentiviruses were  
11 produced with the pFU-cASTN2-EGFP and pFU-cJDUP-EGFP plasmids as previously  
12 reported (54). Viruses were collected and concentrated 45 hrs post transfection and  
13 the pH of the media was kept between 7-7.3. Neonatal (24-30 hrs old) F1s from  
14 hemizygous PCP2-Cre breeding pairs (Jackson Laboratory, B6.Cg-Tg(Pcp2-  
15 cre)<sup>3555Jdhu/J</sup>) were cryoanesthetized and injected using a modified protocol of  
16 Kim et al. (56) using a 10  $\mu$ L Hamilton syringe (Hamilton #1701-RN) fitted with a  
17 custom 32 gauge needle (point style: #4; angle: 12°; length: 9.52 mm; Hamilton  
18 #7803-04). The needle was inserted perpendicular to the occipital plate at a depth  
19 of ~2.5 mm, centering the tip in-line with the anterior-posterior axis and between  
20 the ears. All procedures were approved by the Duke University Institutional Animal  
21 Care and Use Committee and were in compliance with regulations.

22 *Electrophysiology:* Acute sagittal slices (250  $\mu$ m thick) were prepared from the  
23 cerebellar vermis of 3-4 week old injected (PCP2-Cre+) and control littermates

1 (PCP2-Cre<sup>-/-</sup>). Slices were cut in an ice-cold potassium cutting solution (57)  
2 consisting of (in mM): 130 K-gluconate, 15 KCl, 0.05 EGTA, 20 HEPES, 25 glucose, pH  
3 7.4 with KOH, and were transferred to an incubation chamber containing artificial  
4 CSF comprised of (in mM): 125 NaCl, 26 NaHCO<sub>3</sub>, 1.25 NaH<sub>2</sub>PO<sub>4</sub>, 2.5 KCl, 2 CaCl<sub>2</sub>, 1  
5 MgCl<sub>2</sub>, and 25 glucose (pH 7.3, osmolarity 310). Electrophysiological recordings  
6 were performed at 32-33° C using a Multiclamp 700B amplifier (Axon Instruments),  
7 with signals digitized at 50 kHz and filtered at 10 kHz. All whole-cell recordings  
8 were performed using a cesium-based internal solution containing (in mM): 140 Cs-  
9 gluconate, 15 HEPES, 0.5 EGTA, 2 TEA-Cl, 2 MgATP, 0.3 NaGTP, 10 Phosphocreatine-  
10 Tris<sub>2</sub>, 2 QX 314-Cl. pH was adjusted to 7.2 with CsOH. For parallel fiber stimulation  
11 experiments, glass monopolar electrodes (2-3 MΩ) were filled with aCSF, and  
12 current was generated using a stimulus isolation unit (A.M.P.I., ISO-  
13 Flex). Spontaneous miniature synaptic currents were recorded in the presence of  
14 tetrodotoxin (TTX, 0.5 μM, Tocris). IPSCs were recorded at the empirically  
15 determined EPSC reversal potential (~+10 mV), and EPSCs were recorded at the  
16 IPSC reversal potential (~-75 mV). Membrane potentials were not corrected for the  
17 liquid junction potential. Series resistance was monitored with a -5 mV  
18 hyperpolarizing pulse, and only recordings that remained stable over the period of  
19 data collection were used. Miniature IPSCs and EPSCs were analyzed using  
20 MiniAnalysis software (v6.0.3, Synaptosoft Inc.), using a 1 kHz low pass Butterworth  
21 filter and a detection threshold set to 5x (for IPSCs) or 10x (for EPSCs) higher than  
22 baseline noise. So that no individual recording biased our distributions, 400 mIPSCs  
23 and 120 mEPSCs from each cell were randomly selected to establish the amplitude

1 and frequency distributions of events across conditions. To measure the paired  
2 pulse ratio, parallel fibers were stimulated at 20 Hz.

3 *Quantification and statistics:* Observations were replicated in at least three  
4 independent experiments (technical replicates). Data represented in graphs are  
5 both biological (pooled or individual animals/starting material) and technical  
6 (repeated multiple times) replicates, except for Fig. 1c, where individual data points  
7 are shown for human samples. Pixel intensities of Western Blots and  
8 immunolabelings were quantified using ImageJ. Surface and internal labeling of  
9 NLG1-HA-YFP as well as NLGN2 labeling in PCs *in vivo* were quantified as follows:  
10 each cell and its processes including dendritic spines in the case of GCs, and the cell  
11 soma only in the case of PCs *in vivo*, were outlined. The “integrated density” was  
12 measured (sum of all pixel intensities/ $\mu\text{m}^2$ ). The “mean fluorescence background”  
13 of each channel was also measured by selecting an area containing no cells. The  
14 “corrected fluorescence” was then calculated per cell as: integrated density – (area  
15 of selected cell \* mean fluorescence intensity of image). For GCs, 20 cells per  
16 coverslip and 2 coverslips per condition were imaged from three independent  
17 experiments. The data plotted as mean $\pm$  1 SEM. “total” in Fig. 5d represents the  
18 sum of the total pulse (internal labeling +surface labeling values). All data were  
19 checked for normality with Shapiro Wilk’s test. Outliers, identified in box plots, were  
20 removed and non-normal data were natural log transformed to obtain normal  
21 distribution. Specifically four outliers were removed out of 164 data points in Fig 5d.  
22 In general, data were analysed by ANOVA, but if a co-variate was present (eg: “area”  
23 or “total pulse”) then ANCOVA was used, taking these co-variates into account.

1 Where applicable P-values were calculated assuming equal variances among groups  
2 (tested with Levene's test) and were 2-sided unless stated otherwise. Differences  
3 between groups when more than two were present were identified by Bonferroni's  
4 post-hoc test. The total number of cells per condition (n) analysed is stated on each  
5 bar and the total number of experiments given as N. All electrophysiology data were  
6 analysed with the Mann-Whitney U test using GraphPad Prism software (GraphPad)  
7 and Clampfit (Molecular Devices).  $\Delta_{max}$  describes the percentage of maximum  
8 difference between each pair of distributions. Significant statistical difference  
9 between distributions of mEPSC and mIPSC amplitudes and frequencies is defined  
10 by  $p < 0.01$ .

### 11 **Author contributions**

12 H.B and M.E.H conceived of the project. H.B wrote the manuscript. M.E.H and C.H  
13 edited the manuscript. H.B designed and carried out all experiments and analyzed  
14 data, except the electrophysiology. P.W assisted in co-IP experiments, flow  
15 cytometry, and cloning. Z.H carried out co-IP and flow cytometry experiments and  
16 provided critical comments on the manuscript. T.F and C.H carried out slice culture  
17 electrophysiological recordings and analyzed data. M. L. provided clinical  
18 assessments of patients.

### 19 **Acknowledgments**

20 We thank Dr Ines Ibanez-Tallon (The Rockefeller University) for the pFU-cMVIIA-PE  
21 plasmid and for helpful discussions regarding experimental design, Drs Beatriz  
22 Antolin-Fontes and Nathalie Blachere (The Rockefeller University), Kunihiro Uryu

1 and Nadine Soplop (Rockefeller University EM Facility), Pablo Ariel, Alison North  
2 (Rockefeller University Imaging Facility), and Brian Dill (Rockefeller University  
3 Proteomics Facility) for expert advice and technical assistance, and Drs Mustafa  
4 Sahin (Boston Children's Hospital), David Solecki (St Jude Children's Research  
5 Hospital), and Eve Govek (The Rockefeller University) for helpful comments on the  
6 manuscript and Yin Fang for technical support. We also thank Leila Jamal and Dr  
7 Denise Batista (Kennedy Krieger Institute) for communicating details of patient  
8 CNVs and facilitating sample collection. The Neuroligin constructs were kind gifts  
9 from Drs Ann-Marie Craig (University of British Columbia) and Peter Scheiffele  
10 (University of Basel), and the SLC12a5 construct from Dr Pavel Uvarov (University  
11 of Helsinki). The Rockefeller University Proteomics Resource Center acknowledges  
12 funding from the Leona M. and Harry B. Helmsley Charitable Trust. This study  
13 makes use of data generated by the DECIPHER community. A full list of centers that  
14 contributed to the generation of the data is available from  
15 <http://decipher.sanger.ac.uk> and funding was provided by the Wellcome Trust.

16

## 17 **References**

- 18 1. Wilson PM, Fryer RH, Fang Y, & Hatten ME (2010) Astn2, a novel member of  
19 the astrotactin gene family, regulates the trafficking of ASTN1 during glial-  
20 guided neuronal migration. *J Neurosci* 30(25):8529-8540.
- 21 2. Stitt TN & Hatten ME (1990) Antibodies that recognize astrotactin block  
22 granule neuron binding to astroglia. *Neuron* 5(5):639-649.

- 1 3. Adams NC, Tomoda T, Cooper M, Dietz G, & Hatten ME (2002) Mice that lack  
2 astrotactin have slowed neuronal migration. *Development* 129(4):965-972.
- 3 4. Fishell G & Hatten ME (1991) Astrotactin provides a receptor system for CNS  
4 neuronal migration. *Development* 113(3):755-765.
- 5 5. Lesch KP, *et al.* (2008) Molecular genetics of adult ADHD: converging  
6 evidence from genome-wide association and extended pedigree linkage  
7 studies. *J Neural Transm (Vienna)* 115(11):1573-1585.
- 8 6. Vrijenhoek T, *et al.* (2008) Recurrent CNVs disrupt three candidate genes in  
9 schizophrenia patients. *Am J Hum Genet* 83(4):504-510.
- 10 7. Glessner JT, *et al.* (2009) Autism genome-wide copy number variation  
11 reveals ubiquitin and neuronal genes. *Nature* 459(7246):569-573.
- 12 8. Bernardini L, *et al.* (2010) High-resolution SNP arrays in mental retardation  
13 diagnostics: how much do we gain? *Eur J Hum Genet* 18(2):178-185.
- 14 9. Lionel AC, *et al.* (2011) Rare copy number variation discovery and cross-  
15 disorder comparisons identify risk genes for ADHD. *Sci Transl Med*  
16 3(95):95ra75.

- 1 10. Lionel AC, *et al.* (2014) Disruption of the ASTN2/TRIM32 locus at 9q33.1 is a  
2 risk factor in males for autism spectrum disorders, ADHD and other  
3 neurodevelopmental phenotypes. *Hum Mol Genet* 23(10):2752-2768.
- 4 11. Glickstein M (2007) What does the cerebellum really do? *Curr Biol*  
5 17(19):R824-827.
- 6 12. Timmann D & Daum I (2007) Cerebellar contributions to cognitive functions:  
7 a progress report after two decades of research. *Cerebellum* 6(3):159-162.
- 8 13. Strick PL, Dum RP, & Fiez JA (2009) Cerebellum and nonmotor function.  
9 *Annu Rev Neurosci* 32:413-434.
- 10 14. Fatemi SH, *et al.* (2012) Consensus paper: pathological role of the cerebellum  
11 in autism. *Cerebellum* 11(3):777-807.
- 12 15. Kloth AD, *et al.* (2015) Cerebellar associative sensory learning defects in five  
13 mouse autism models. *Elife* 4:e06085.
- 14 16. Tsai PT, *et al.* (2012) Autistic-like behaviour and cerebellar dysfunction in  
15 Purkinje cell Tsc1 mutant mice. *Nature* 488(7413):647-651.



- 1 17. Price JC, Guan S, Burlingame A, Prusiner SB, & Ghaemmaghami S (2010)  
2 Analysis of proteome dynamics in the mouse brain. *Proc Natl Acad Sci U S A*  
3 107(32):14508-14513.
- 4 18. Stevens B, *et al.* (2007) The classical complement cascade mediates CNS  
5 synapse elimination. *Cell* 131(6):1164-1178.
- 6 19. Schwenk J, *et al.* (2012) High-resolution proteomics unravel architecture and  
7 molecular diversity of native AMPA receptor complexes. *Neuron* 74(4):621-  
8 633.
- 9 20. Krishnan A, *et al.* (2016) Genome-wide prediction and functional  
10 characterization of the genetic basis of autism spectrum disorder. *Nat*  
11 *Neurosci* 19:1454-1462.
- 12 21. Zhou Z, Meng Y, Asrar S, Todorovski Z, & Jia Z (2009) A critical role of Rho-  
13 kinase ROCK2 in the regulation of spine and synaptic function.  
14 *Neuropharmacology* 56(1):81-89.
- 15 22. Rivera C, *et al.* (1999) The K<sup>+</sup>/Cl<sup>-</sup> co-transporter KCC2 renders GABA  
16 hyperpolarizing during neuronal maturation. *Nature* 397(6716):251-255.
- 17 23. Li H, *et al.* (2007) KCC2 interacts with the dendritic cytoskeleton to promote  
18 spine development. *Neuron* 56(6):1019-1033.

- 1 24. Merner ND, *et al.* (2015) Regulatory domain or CpG site variation in  
2 SLC12A5, encoding the chloride transporter KCC2, in human autism and  
3 schizophrenia. *Front Cell Neurosci* 9:386.
- 4 25. Tang X, *et al.* (2016) KCC2 rescues functional deficits in human neurons  
5 derived from patients with Rett syndrome. *Proc Natl Acad Sci U S A*  
6 113(3):751-756.
- 7 26. Banerjee A, *et al.* (2016) Jointly reduced inhibition and excitation underlies  
8 circuit-wide changes in cortical processing in Rett syndrome. *Proc Natl Acad*  
9 *Sci U S A* 113(46):E7287-E7296.
- 10 27. Sudhof TC (2008) Neuroligins and neurexins link synaptic function to  
11 cognitive disease. *Nature* 455(7215):903-911.
- 12 28. Prelich G (2012) Gene overexpression: uses, mechanisms, and interpretation.  
13 *Genetics* 190(3):841-854.
- 14 29. Zhang B, *et al.* (2015) Neuroligins Sculpt Cerebellar Purkinje-Cell Circuits by  
15 Differential Control of Distinct Classes of Synapses. *Neuron* 87(4):781-796.
- 16 30. Heo S, *et al.* (2018) Identification of long-lived synaptic proteins by  
17 proteomic analysis of synaptosome protein turnover. *Proc Natl Acad Sci U S A*  
18 115(16):E3827-E3836.

- 1 31. Ni T, Harlos K, & Gilbert R (2016) Structure of astrotactin-2: a conserved  
2 vertebrate-specific and perforin-like membrane protein involved in neuronal  
3 development. *Open Biol* 6(5):160053.  
4
- 5 32. Bonifacino JS & Traub LM (2003) Signals for sorting of transmembrane  
6 proteins to endosomes and lysosomes. *Annu Rev Biochem* 72:395-447.
- 7 33. Otomo A, Pan L, & Hadano S (2012) Dysregulation of the autophagy-  
8 endolysosomal system in amyotrophic lateral sclerosis and related motor  
9 neuron diseases. *Neurol Res Int* 2012:498428.
- 10 34. Razi M, Chan EY, & Tooze SA (2009) Early endosomes and endosomal  
11 coatomer are required for autophagy. *J Cell Biol* 185(2):305-321.
- 12 35. Bayes A, *et al.* (2012) Comparative study of human and mouse postsynaptic  
13 proteomes finds high compositional conservation and abundance differences  
14 for key synaptic proteins. *PLoS One* 7(10):e46683.
- 15 36. Walmsley B, Alvarez FJ, & Fyffe RE (1998) Diversity of structure and function  
16 at mammalian central synapses. *Trends Neurosci* 21(2):81-88.
- 17 37. Khalilov I, *et al.* (2011) Enhanced Synaptic Activity and Epileptiform Events  
18 in the Embryonic KCC2 Deficient Hippocampus. *Front Cell Neurosci* 5:23.

- 1 38. Marrocco J, *et al.* (2017) A sexually dimorphic pre-stressed translational  
2 signature in CA3 pyramidal neurons of BDNF Val66Met mice. *Nat Commun*  
3 8(1):808.
- 4 39. Allen G & Courchesne E (2003) Differential effects of developmental  
5 cerebellar abnormality on cognitive and motor functions in the cerebellum:  
6 an fMRI study of autism. *Am J Psychiatry* 160(2):262-273.
- 7 40. Amaral DG, Schumann CM, & Nordahl CW (2008) Neuroanatomy of autism.  
8 *Trends Neurosci* 31(3):137-145.
- 9 41. Stoodley CJ, *et al.* (2017) Altered cerebellar connectivity in autism and  
10 cerebellar-mediated rescue of autism-related behaviors in mice. *Nat Neurosci*  
11 20(12):1744-1751.
- 12 42. Willsey AJ, *et al.* (2013) Coexpression networks implicate human midfetal  
13 deep cortical projection neurons in the pathogenesis of autism. *Cell*  
14 155(5):997-1007.
- 15 43. Parikshak NN, *et al.* (2013) Integrative functional genomic analyses implicate  
16 specific molecular pathways and circuits in autism. *Cell* 155(5):1008-1021.

- 1 44. Koekkoek SK, *et al.* (2005) Deletion of FMR1 in Purkinje cells enhances  
2 parallel fiber LTD, enlarges spines, and attenuates cerebellar eyelid  
3 conditioning in Fragile X syndrome. *Neuron* 47(3):339-352.
- 4 45. Baudouin SJ, *et al.* (2012) Shared synaptic pathophysiology in syndromic and  
5 nonsyndromic rodent models of autism. *Science* 338(6103):128-132.
- 6 46. Reith RM, *et al.* (2013) Loss of Tsc2 in Purkinje cells is associated with  
7 autistic-like behavior in a mouse model of tuberous sclerosis complex.  
8 *Neurobiol Dis* 51:93-103.
- 9 47. Piochon C, *et al.* (2014) Cerebellar plasticity and motor learning deficits in a  
10 copy-number variation mouse model of autism. *Nat Commun* 5:5586.
- 11 48. Sztainberg Y & Zoghbi HY (2016) Lessons learned from studying syndromic  
12 autism spectrum disorders. *Nat Neurosci* 19(11):1408-1417.
- 13 49. Baptista CA, Hatten ME, Blazeski R, & Mason CA (1994) Cell-cell interactions  
14 influence survival and differentiation of purified Purkinje cells in vitro.  
15 *Neuron* 12(2):243-260.
- 16 50. Acton BA, *et al.* (2012) Hyperpolarizing GABAergic transmission requires the  
17 KCC2 C-terminal ISO domain. *J Neurosci* 32(25):8746-8751.

- 1 51. Graf ER, Zhang X, Jin SX, Linhoff MW, & Craig AM (2004) Neurexins induce  
2 differentiation of GABA and glutamate postsynaptic specializations via  
3 neuroligins. *Cell* 119(7):1013-1026.
- 4 52. Pettem KL, Yokomaku D, Takahashi H, Ge Y, & Craig AM (2013) Interaction  
5 between autism-linked MDGAs and neuroligins suppresses inhibitory  
6 synapse development. *J Cell Biol* 200(3):321-336.
- 7 53. Nuriya M & Huganir RL (2006) Regulation of AMPA receptor trafficking by N-  
8 cadherin. *J Neurochem* 97(3):652-661.
- 9 54. Auer S, *et al.* (2010) Silencing neurotransmission with membrane-tethered  
10 toxins. *Nat Methods* 7(3):229-236.
- 11 55. Kall L, Canterbury JD, Weston J, Noble WS, & MacCoss MJ (2007) Semi-  
12 supervised learning for peptide identification from shotgun proteomics  
13 datasets. *Nat Methods* 4(11):923-925.
- 14 56. Kim JY, *et al.* (2013) Viral transduction of the neonatal brain delivers  
15 controllable genetic mosaicism for visualising and manipulating neuronal  
16 circuits in vivo. *Eur J Neurosci* 37(8):1203-1220.

- 1 57. Dugue GP, Dumoulin A, Triller A, & Dieudonne S (2005) Target-dependent
- 2 use of co-released inhibitory transmitters at central synapses. *J Neurosci*
- 3 25(28):6490-6498.
- 4

1

## 2 **Figure Legends**

3 *Figure 1. ASTN2 expression in patients.*

4 **(a)** Expression of *ASTN2* detected in human CD4+ T cells but not in monocytes.

5 Positive (human fibroblasts), negative (no template), and no reverse transcription

6 (no RT) controls are indicated. **b)** *ASTN2* mRNA levels, expressed as  $2^{-\Delta\Delta CT}$  (cycle

7 time by qRT-PCR) in relation to GUSB (endogenous control) and **(c)** protein levels in

8 *ASTN2* CNV patient T cells versus controls, quantified in graph to the right.

9 Quantifications of individual *ASTN2* bands (upper and lower bands) in relation to

10 GAPDH are shown at the bottom. N= 3 patients and 3 controls. Bars show means +/-

11 1 S.D. (standard deviation).

12



1

2 *Figure 2. ASTN2 subcellular protein localization in the cerebellum.*

3 Sagittal sections of cerebellum labeled with antibodies against **(a)** ASTN2 (green)  
4 and **(c-e)** ASTN2 (red) and Calbindin (green) at P15. (b) negative control (no  
5 primary antibody), (e) zoom of one PC. Dotted lines in (d) outline PC bodies and  
6 primary dendrites. **(f-o)** Immuno-gold EM labeling of ASTN2 at P28. (f) Negative  
7 control (no primary), (g) ASTN2 labeling in a PC soma associated with the plasma  
8 membrane (highlighted by asterisks and black arrow), membranes of the ER (white  
9 arrow), trafficking vesicles (white arrowhead and, see also **i**), and autophagosomes  
10 (black arrowheads and see also **j**). (h) High power image showing ASTN2 labeling  
11 associated with an endocytic vesicle at the plasma membrane. (k) PC dendrite in the  
12 ML with ASTN2 labeling on isolation membranes (arrow). Synapses in this image  
13 are negative for ASTN2. (l) PC dendritic area with positive labeling in a spine (white  
14 arrowhead). (m-o) higher magnification examples of PC dendritic spines showing  
15 ASTN2 labeling (arrows). N= 3 biological and 3 technical replicates. GC, granule cell;  
16 IGL, internal granule layer; M, mitochondria; ML, molecular layer; PC, Purkinje cell;  
17 WM, white matter. Scale bars: 100  $\mu$ m in a, b, 10  $\mu$ m in c-e, 0.5  $\mu$ m in f, g, k, l.

18

1

2 *Figure 3. ASTN2 regulation of Neuroligin surface expression by protein-protein*

3 *binding and endocytosis.*

4 **(a)** Western blots showing co-IP of ASTN2 and JDUP with Neuroligins 1-4 in HEK

5 293T. **(b)** Live immuno-labeling of surface Neuroligin expression (Alexa-647, red

6 quadrants) in HEK 293T cells analysed by flow cytometry in cells co-expressing

7 NLGN1-HA-YFP or NLGN3-YFP with either a MYC control vector (top panels) or with

8 ASTN2-HA (bottom panels). Surface GPI-anchored EGFP is unaltered by ASTN2 (far

9 right graphs). **(c)** Pulse-chase labeling of NLGN1-HA-YFP co-expressed with either

10 EGFP or ASTN2-EGFP in GCs showing surface (white) and internalized (red) NLGN1

11 labeling after a 20 min chase. Far right image is a negative control, showing that the

12 EGFP from ASTN2-EGFP (or EGFP) is not detected on the surface. **(d)** Quantification

13 of the pulse-chase expressed as integrated pixel density (sum of all pixel intensities

14 per area minus the background) of the internal labeling divided by the integrated

15 pixel density of the total pulse (red + white). Graph show means +/- 1 SEM. N=

16 number of experiments, n= total number of cells analysed. P-value calculated by

17 ANCOVA (see methods). Protein ladder in kDa. WB, Western blot, Scale bars: 10µm.

18

1

2 *Figure 4. Protein interactors of ASTN2 identified by IP plus LC-MS/MS.*

3 **(a)** Heat map of the top 57 candidate interacting proteins enriched in ASTN2 IPs in  
4 three experiments from P22-28 cerebellar lysates. The intensity of the map is based  
5 on the MS intensity spectra values (see Table S2). IP I and II are biological and  
6 technical replicates. IP III is a third biological replicate, which was washed more  
7 stringently and performed separately (see methods). **(b)** Lists of identified proteins  
8 by functional enrichment. Proteins belonging to the list of top hits (in a) are shown  
9 in red. ASD-associated proteins found by cross-referencing Table S2 to the SFARI  
10 human ASD-gene list ([www.gene.sfari.org](http://www.gene.sfari.org)) are marked with blue asterisks. **(c, d)**  
11 Western blots showing co-IPs of AP-2 (sigma fragment, Ap2s) and SLC12a5 with  
12 ASTN2 or JDUP in HEK 293T cells (c) and of AP2, ROCK2, and ASTN2 in cerebellar  
13 lysates at P22 (d). Protein ladder in kDa. In the SLC12a5 blot GFP appears in all  
14 samples due to the existence of an IRES-EGFP in the SLC12a5-HA construct.

15

1

2 *Figure 5. ASTN2 reduces the levels of interacting proteins.*

3 **(a)** Western blots showing reduced protein levels of NLGN1-4 and OLFM1 in HEK  
4 293T cells in the presence of ASTN2 as compared to MYC (control) or OLFM1 alone.

5 **(b)** Western blots showing reduced expression of NLGN1 and SLC12a5 in HEK 293T  
6 cells in the presence of ASTN2 or ASTN2 co-expressed with a scrambled plasmid,  
7 but less so in the presence of JDUP, MYC, or when ASTN2 is knocked-down with  
8 shRNA. GAPDH was used as an internal control for protein loading. **(c)** A

9 representative Western blot showing ROCK2 levels in *ASTN2* CNV patient T cells.  
10 The controls consisted of the mother and unrelated healthy subjects. Quantification  
11 of *ASTN2* normalized to GAPDH in four technical replicates of 3 patients and 3  
12 controls is shown in the box plot. **(d)** Conditional expression of *ASTN2*-EGFP and  
13 *JDUP*-EGFP (green) in sagittal sections of *PCP2-Cre+* cerebella labeled with  
14 antibodies against Calbindin (red), *NLGN2* (blue) and *Glud2* (white). Quantification  
15 of *NLGN2* levels (corrected integrated pixel density) in PC somas (outlined by  
16 dashed lines) upon *ASTN2* versus *JDUP* overexpression or control (*PCP2-Cre<sup>-/-</sup>* mice  
17 injected with conditional *ASTN2*-EGFP virus). Graph shows means  $\pm$  1 SEM. n=  
18 total number of cells analysed from 3 mice per condition. P-value at top by ANCOVA  
19 and closer to bars by post-hoc tests between groups. Scale bar: 10 $\mu$ m

20

1  
2 *Figure 6. Effect of ASTN2 overexpression on synaptic activity of Purkinje cells.*  
3 **(a)** Schematic of conditional lentiviral vectors. Expression of ASTN2-EGFP or JDUP-  
4 EGFP is driven by the Ubiquitin C promoter in the presence of Cre. **(b)** Sagittal  
5 sections showing JDUP-EGFP and ASTN2-EGFP (green) expression in PCs marked by  
6 Calbindin (red) and GluD2 (white) 3-4 weeks after injection into *Pcp2-Cre+* mice.  
7 Arrow indicates ectopic PC in the IGL of an ASTN2-EGFP injected mouse. **(c)**  
8 Miniature inhibitory (mIPSCs, top) and excitatory (mEPSCs, bottom) postsynaptic  
9 currents in control (*PCP2-Cre<sup>-/-</sup>*; black, n=21 cells) and ASTN2 expressing PCs (*PCP2-*  
10 *Cre<sup>+</sup>*; blue, n=14 cells) and in control (*PCP2-Cre<sup>-/-</sup>*; gray, n= 10 cells) and JDUP  
11 expressing PCs (*PCP2-Cre<sup>+</sup>*; orange, n= 12 cells). **(d)** Cumulative histograms of the  
12 amplitude (left) and frequency (right) miniature events in control (black or gray),  
13 and ASTN2 (blue) or JDUP (orange) expressing PCs. Distributions were compared  
14 using the Mann-Whitney U test and were found significantly different between  
15 ASTN2 and controls in all measurements ( $P < 0.0001$ ) except for mEPSC frequency  
16 which was the same between control and ASTN2, but significantly different between  
17 control and JDUP ( $P < 0.0001$ ). **(e)** Left: Evoked parallel fiber EPSCs ( $V_m \sim -75$  mV;  
18 50 ms inter-stimulus interval, arrowheads). Right: summary graphs of paired-pulse  
19 ratios (mean  $\pm$  1 SEM) **(f)** Left: cell-attached recordings of spontaneous spiking.  
20 Right: summary graphs (mean  $\pm$  1 SEM) of spontaneous firing rates. n= total  
21 number of cells recorded from 5-7 animals per condition. Scale bars: 10 $\mu$ m. IGL,  
22 internal granule layer; ML, molecular layer; PC, Purkinje cell layer; ns= not  
23 significant.

a

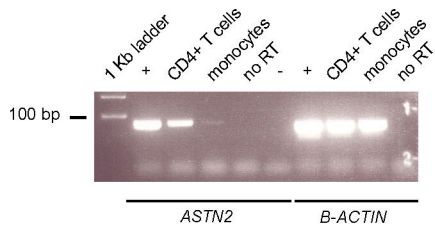

b

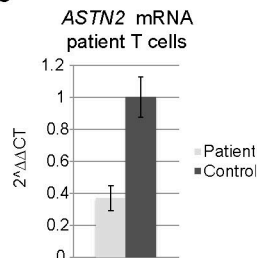

c

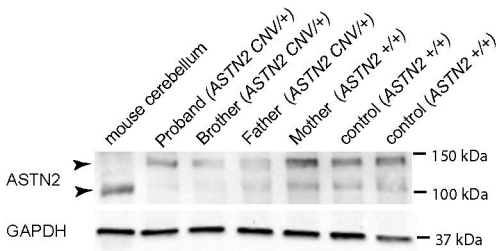

## ASTN2 protein Total

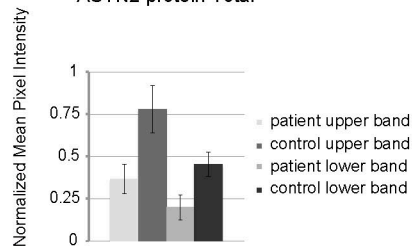

## ASTN2 upper band

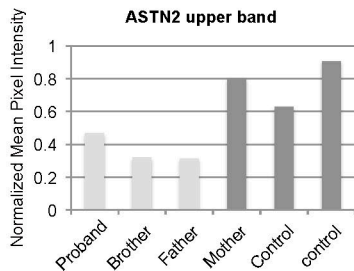

## ASTN2 lower band

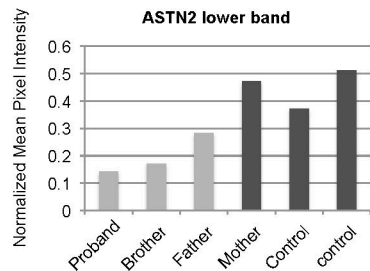

**Fig. 2**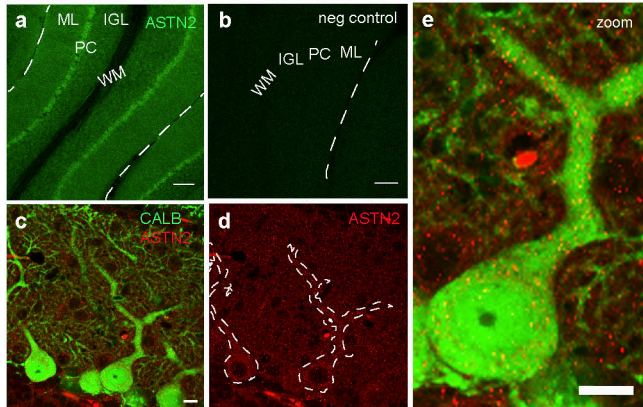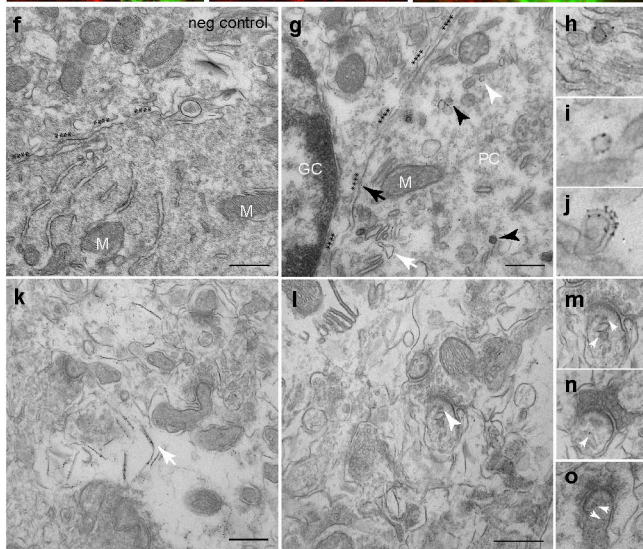





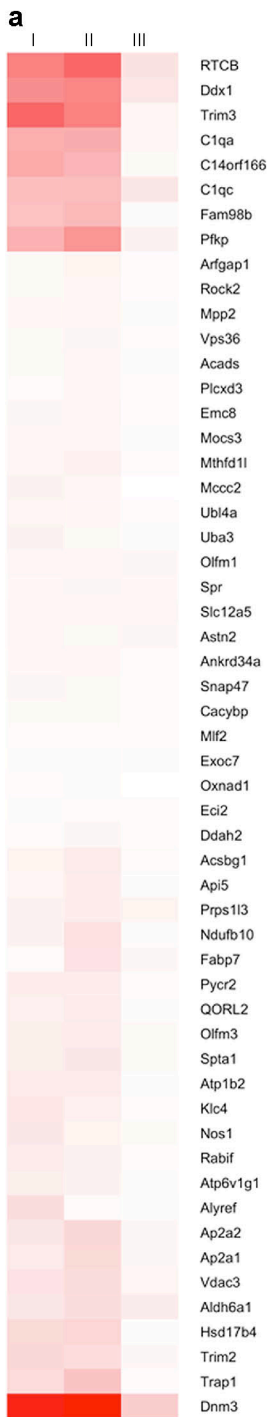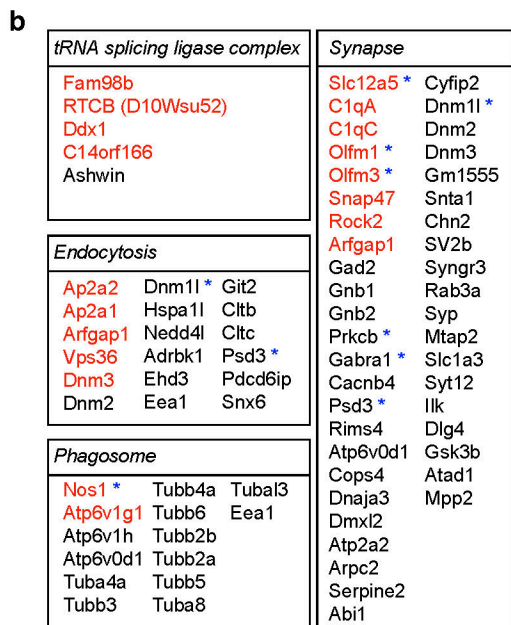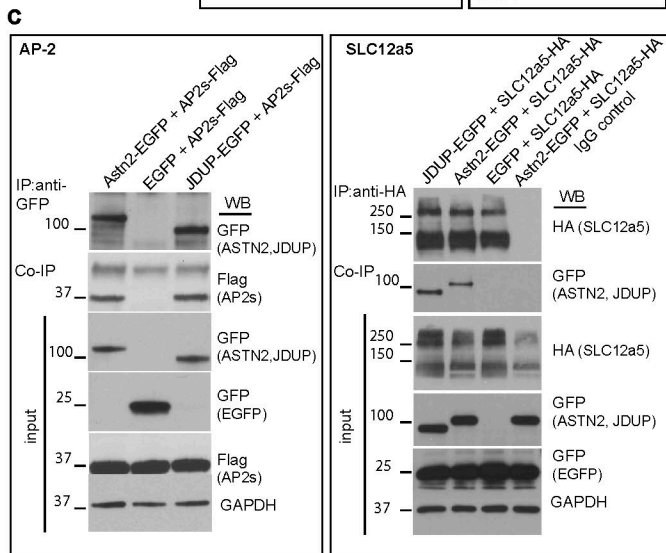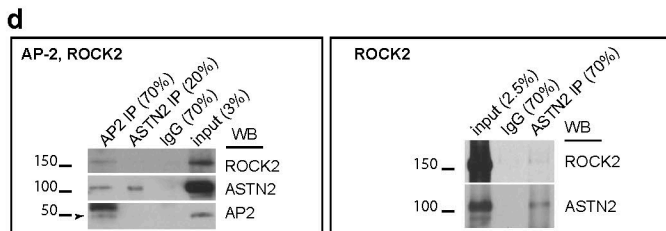

**Fig. 5****a**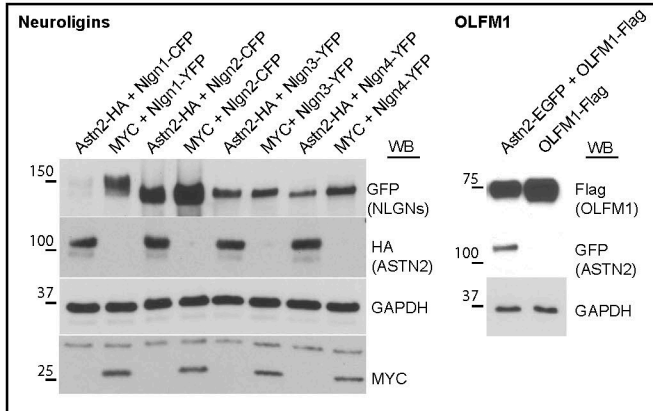**b**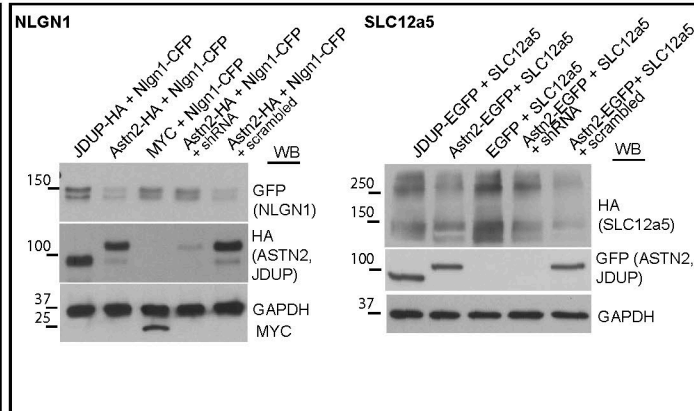**c**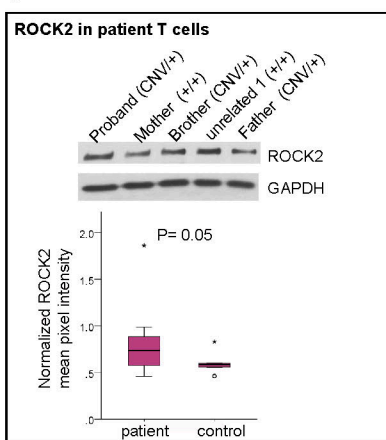**d**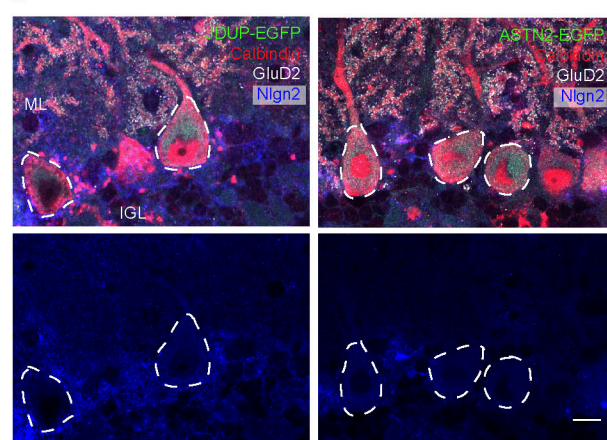

P = 0.046

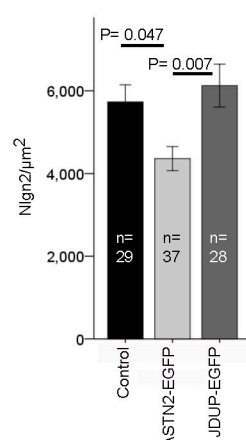

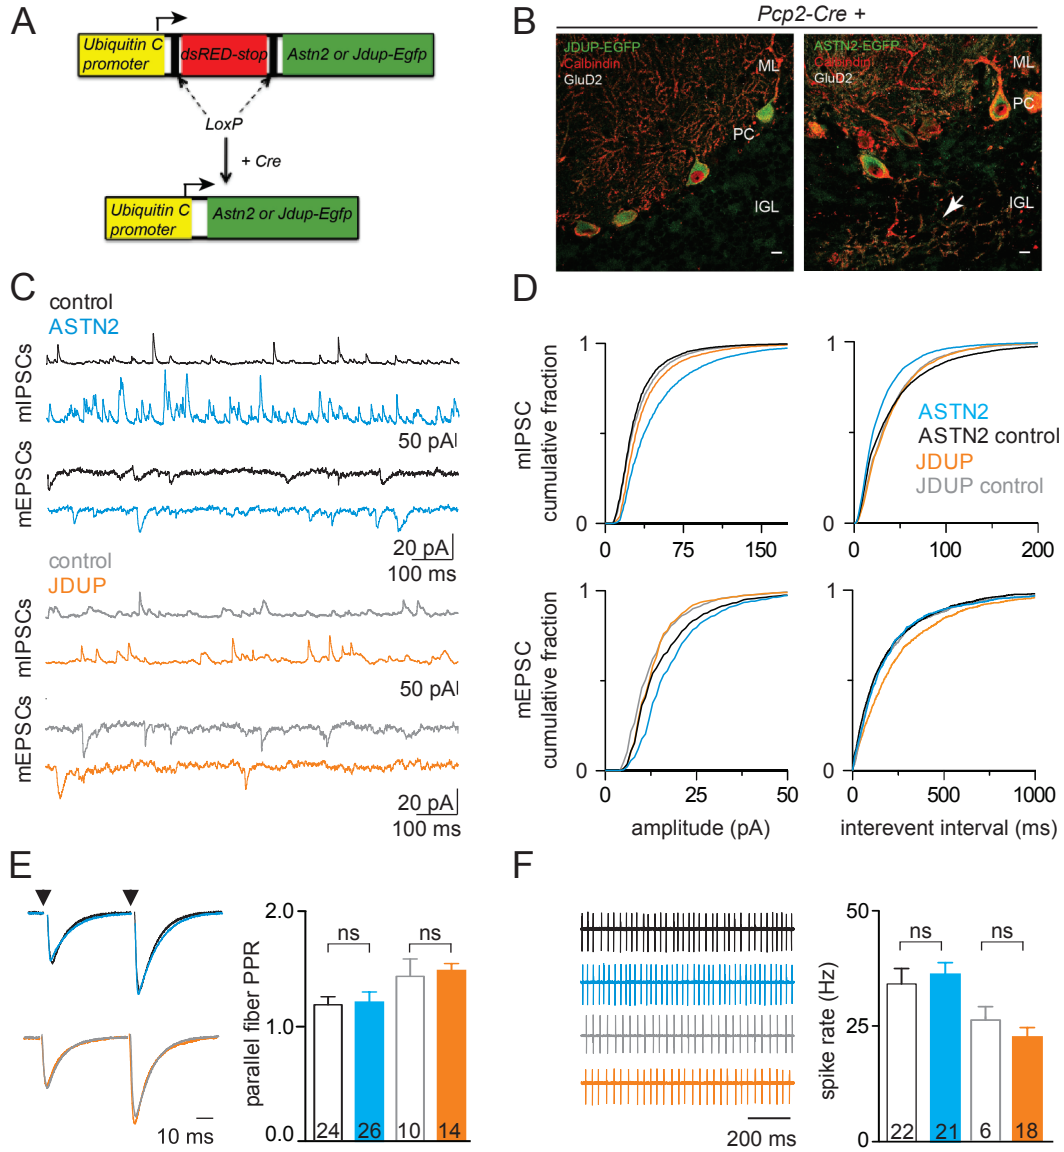

1 *Figure S1. Genomic representation of ASTN2 CNVs and comparison of the occurrence of*  
2 *ID and speech and language impairment in patients*

3 **(a)** Schematic of CNVs (pink box) along the *ASTN2* genomic sequence (green box) with  
4 *ASTN2* protein domains encoded by each exon depicted at the top (blue box). The CNVs  
5 are color-coded according to the diagnosis of the patient (stated in the key at the bottom)  
6 with deletions represented by solid boxes and duplications by lined boxes. The CNVs  
7 represented were gathered from the following reports (Vrijenhoek et al., 2008, Glessner  
8 et al., 2009, Lionel et al., 2011, Bernardini et al., 2010) and personal communications (L.  
9 Jamal, Johns Hopkins University). For additional *ASTN2* CNVs please refer to Lionel et  
10 al., 2014 and the DECIPHER database. **(b)** Comparison of the occurrence rate of ID and  
11 speech and language delay in patients with various genetic lesions; 4 genes with strong  
12 association with ID, 8 genes with strong association with ASD, versus patients with  
13 *ASTN2* or *ASTN1* CNVs (DECIPHER database: [www.decipher.sanger.ac.uk](http://www.decipher.sanger.ac.uk)). *ASTN2*  
14 CNVs fall above the median for ID, *ASTN1* is the highest scoring for ID, while *ASTN2*  
15 but not *ASTN1* is among the highest for enrichment in speech and language delay,  
16 excluding the classical speech and language genes *FOXP2* and *CNTNAP2* (Graham and  
17 Fisher, 2013)

1 *Figure S2. Endo/lysosomal signals in ASTN2 and JDUP protein sequences*

2 Protein sequences of the two mouse isoforms of ASTN2 and the truncated version  
3 (JDUP) modeled on the patient family CNV. Red boxes indicate the peptide against  
4 which the ASTN2 antibody was raised (Wilson et al., 2010) and also used for depleting  
5 the antibody sera for use as a control in IPs (Fig. 4 and Fig. S6). Green boxes highlight  
6 endosomal and lysosomal sorting signals. Blue texts highlight protein sequences encoded  
7 by alternating exons.

1 *Figure S3. shRNA-mediated knockdown of ASTN2 and antibody specificity*

2 **(a, b)** Knockdown of ASTN2-EGFP by four different shRNA constructs in HEK 293T  
3 cells by Western blot (a) and immunohistochemistry (b) using a rabbit antibody  
4 against ASTN2. GAPDH (at 37 kDa) was used as loading control in a. In b, top panel  
5 shows ASTN2-EGFP (green, cytoplasmic/membrane) and detected by anti-ASTN2  
6 (red), bottom panel shows EGFP expressed from the shRNA construct (green,  
7 nuclear and cytoplasmic) but no trace of ASTN2-EGFP labeling with the ASTN2  
8 antibody (red channel) in the presence of shRNA#3. Dapi marks nuclei. **(c, d)**  
9 Western blots showing ASTN2 protein expression in cerebellar granule cells  
10 transfected with the same shRNA constructs as in a. (c) shows Western blot on non-  
11 sorted mixed transfected cells and (d) shows lysates from FACsorted GFP-positive  
12 (expressing the shRNA construct) and GFP-negative populations.

1 *Figure S4. ASTN2 co-localization with endosomal markers*  
2 Immunohistochemistry of ASTN2 (green) with markers for recycling Rab4 **(a)**, early  
3 Rab5 **(b)**, and late Rab7 **(c)** endosomes in red in the postnatal cerebellum. Each  
4 section (sagittal) shows a PC soma and its immediate surroundings. Arrows point to  
5 examples of co-labeled puncta. Nuclei are marked by Dapi (blue) in b and c. PC,  
6 Purkinje cell, Scale bar: 10  $\mu\text{m}$

1 *Figure S5. Quantification of surface labeling of NLGN1 in cerebellar granule cells*  
2 Image quantifications of surface labeling of NLGN1-HA-YFP co-expressed with  
3 either EGFP or ASTN2-EGFP in GCs. Graphs show the integrated pixel density of  
4 surface labeling as an index of total labeling (corrected for background, **a**), as well as  
5 surface labeling alone (**b**). Bars show mean +/- 1 SEM from three independent  
6 experiments. The number of cells analysed per condition are stated on each bar. P-  
7 values were obtained for comparison of surface labeling by ANCOVA in a, taking into  
8 account total labeling, and by ANOVA in b.



1 *Figure S6. Immunoprecipitation of ASTN2 and protein interactors*

2 **(a)** Representative Western blots of IPs with anti-ASTN2, rabbit IgG control (right  
3 panel), or depleted ASTN2 anti-sera (left panel) from the juvenile cerebellum used for  
4 mass spec analysis. Blots show 20% of total IP volumes in relation to 2.5% inputs. As the  
5 IPs processed for mass spec were directly eluted in 8M Urea from beads and were not  
6 analysed by Western blot, examples of IPs carried out with the same conditions are  
7 shown. **(b)** Co-IP of OLFM1-Flag with ASTN2-EGFP and ASTN2-EGFP with C1qc-  
8 Flag-myc in HEK293T cells. **(c)** Co-IP of AP2 and NLGN2 with ASTN2 in lysates from  
9 the juvenile cerebellum.

1 Figure S7. *Ectopic Purkinje cells upon conditional expression of ASTN2-EGFP in the*  
2 *cerebellum*  
3 **(a)** Sagittal sections of the cerebellum showing ectopic PCs in the IGL and the WM  
4 (highlighted by arrows) of Lobules X (right panels) and I (left panels) marked by GluD2  
5 expression, in *PCP2-Cre*<sup>+</sup> mice injected with pfU-cASTN2-EGFP (top), but not in pfU-  
6 cJDUP-EGFP (bottom) injected mice or in *PCP2-Cre*<sup>-/-</sup> mice injected with pfU-cASTN2-  
7 EGFP (middle).

1 **References**

- 2  
3 BERNARDINI, L., ALESÌ, V., LODDO, S., NOVELLI, A., BOTTILLO, I., BATTAGLIA, A.,  
4 DIGILIO, M. C., ZAMPINO, G., ERTEL, A., FORTINA, P., SURREY, S. &  
5 DALLAPICCOLA, B. (2010) High-resolution SNP arrays in mental retardation  
6 diagnostics: how much do we gain? *Eur J Hum Genet*, 18, 178-85.  
7  
8 GLESSNER, J. T., WANG, K., CAI, G., KORVATSKA, O., KIM, C. E., WOOD, S., ZHANG, H.,  
9 ESTES, A., BRUNE, C. W., BRADFIELD, J. P., IMIELINSKI, M., FRACKELTON, E.  
10 C., REICHERT, J., CRAWFORD, E. L., MUNSON, J., SLEIMAN, P. M., CHIAVACCI,  
11 R., ANNAIAH, K., THOMAS, K., HOU, C., GLABERSON, W., FLORY, J., OTIENO, F.,  
12 GARRIS, M., SOORYA, L., KLEI, L., PIVEN, J., MEYER, K. J., ANAGNOSTOU, E.,  
13 SAKURAI, T., GAME, R. M., RUDD, D. S., ZURAWIECKI, D., MCDOUGLE, C. J.,  
14 DAVIS, L. K., MILLER, J., POSEY, D. J., MICHAELS, S., KOLEVZON, A.,  
15 SILVERMAN, J. M., BERNIER, R., LEVY, S. E., SCHULTZ, R. T., DAWSON, G.,  
16 OWLEY, T., MCMAHON, W. M., WASSINK, T. H., SWEENEY, J. A.,  
17 NURNBERGER, J. I., COON, H., SUTCLIFFE, J. S., MINSHEW, N. J., GRANT, S. F.,  
18 BUCAN, M., COOK, E. H., BUXBAUM, J. D., DEVLIN, B., SCHELLENBERG, G. D. &  
19 HAKONARSON, H. (2009) Autism genome-wide copy number variation  
20 reveals ubiquitin and neuronal genes. *Nature*, 459, 569-73.  
21  
22 GRAHAM, S. A. & FISHER, S. E. (2013) Decoding the genetics of speech and language.  
23 *Curr Opin Neurobiol*, 23, 43-51.  
24  
25 LIONEL, A. C., CROSBIE, J., BARBOSA, N., GOODALE, T., THIRUVAHINDRAPURAM, B.,  
26 RICKABY, J., GAZZELLONE, M., CARSON, A. R., HOWE, J. L., WANG, Z., WEI, J.,  
27 STEWART, A. F., ROBERTS, R., MCPHERSON, R., FIEBIG, A., FRANKE, A.,  
28 SCHREIBER, S., ZWAIGENBAUM, L., FERNANDEZ, B. A., ROBERTS, W.,  
29 ARNOLD, P. D., SZATMARI, P., MARSHALL, C. R., SCHACHAR, R. & SCHERER, S.  
30 W. (2011) Rare copy number variation discovery and cross-disorder  
31 comparisons identify risk genes for ADHD. *Sci Transl Med*, 3, 95ra75.  
32  
33 VRIJENHOEK, T., BUIZER-VOSKAMP, J. E., VAN DER STELT, I., STRENGMAN, E.,  
34 SABATTI, C., GEURTS VAN KESSEL, A., BRUNNER, H. G., OPHOFF, R. A. &  
35 VELTMAN, J. A. (2008) Recurrent CNVs disrupt three candidate genes in  
36 schizophrenia patients. *Am J Hum Genet*, 83, 504-10.  
37  
38 WILSON, P. M., FRYER, R. H., FANG, Y. & HATTEN, M. E. (2010) Astn2, a novel  
39 member of the astrotactin gene family, regulates the trafficking of ASTN1  
40 during glial-guided neuronal migration. *J Neurosci*, 30, 8529-40.  
41  
42

# Fig. S1

**a**

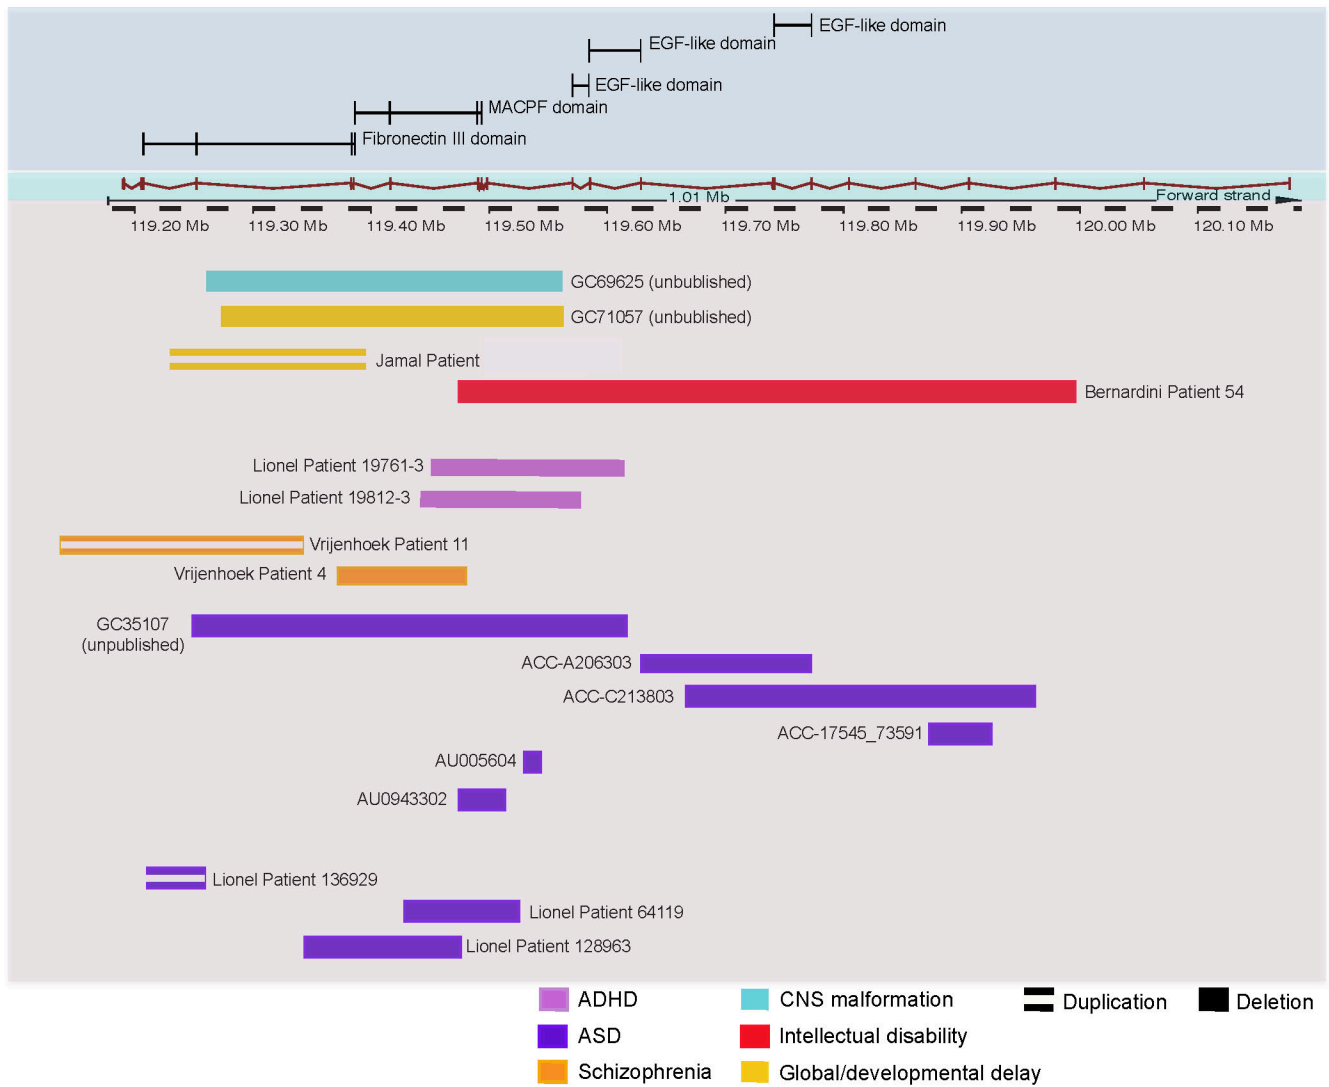

**b**

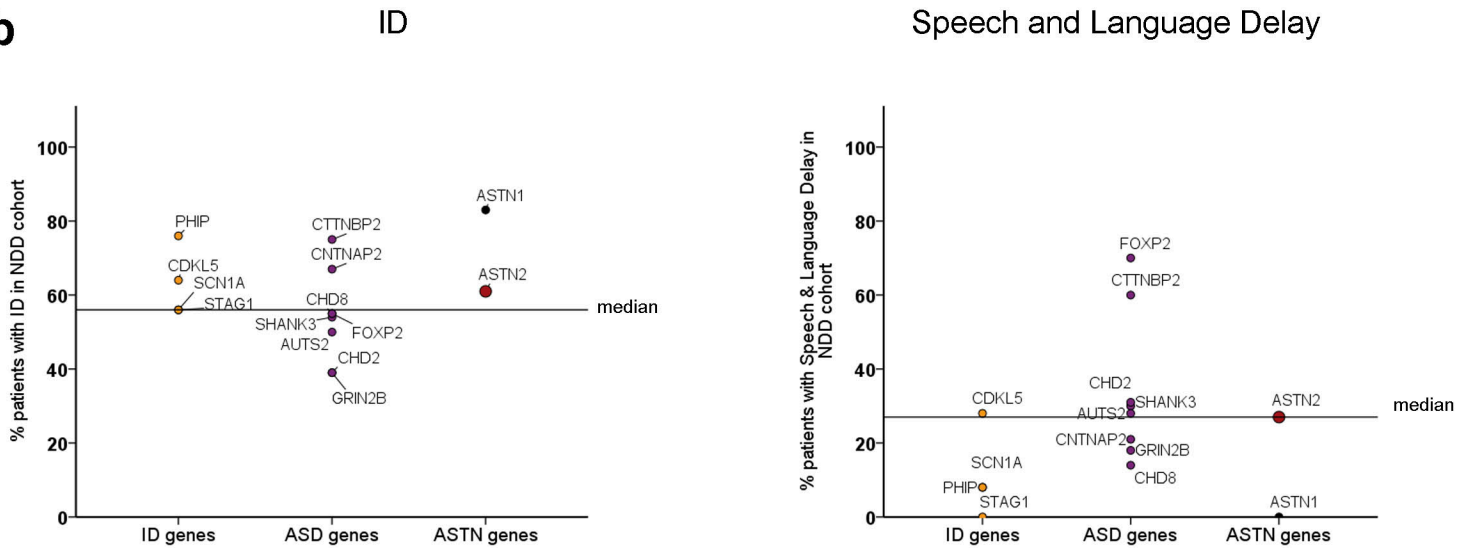

## Supplementary Fig. 2

### **Astn2-001 (mouse isoform 1, 1352 aa)**

MAAAGARRSPGRGLGLRGRPRLGFHPGPPPPPPPLLLLLFLLLLPPPPLLAGATAAAASR  
EPDSPCRLKTVTSTLPALRESDIGWSGARTGAAAGAGAGTGAGAGAAAAAASAASPGSA  
GSAGTAAESRLLLLFVRNELPGRIAVQDDLDNTELPFFTLEMSGTAADISLVHWRQQWLEN  
GTLYFHVSMSSSGQLAQATAPTLQEPSEIVEEQMHILHISVMGGLIALLLLLLVFTVALY  
AQRWQKRRRIIPQKSASTEATHEIHYIPSVLLGPQARESFRSSRLQTHNSVIGVPIRETP  
ILDDYDYEEEEPPRRANHVSREDEFSGQMTHALDSLGRPGEEKVEFEKKAAAEATQETV  
ESLMQKFKEFRANTPVEIGQLQPASRSSTSAGKRKRNRKSRGGISFGRTKGTSGSEADD  
ETQLTFYTEQYRSRRRSKGLLKSPVNKTALTIAVSSCILAMVCGNQMSCPLTVKVTLHV  
PEHFIADGSSFVSEGSYLDISDWLNPAKLSLYYQINATSPWVRDLCGQRTTDACEQLCD  
PDTGECSCHEGYAPDPVHRHLCVRSWDWGQSEGPWPYTTLERGYDLVTGEQAPEKILRSTF  
SLGQGLWLPVSKSFVPPVELSINPLASCKTDVLVTEDPADVREEAMLSTYFETINDLLS  
SFGPVRDCSRNNGGCTRNFKCVSDRQVDSSGCVCPEELKPMKDGSGCYDHSKIDCSDGF  
NGGCEQLCLQQTLPYDTSSTIFMFCGCVVEEYKLAPDGKSCMLSDVCEGPKCLKPDS  
KFNDTLFGEMLHGYNNTQHVNQGVFQMTFRENNFIKDFPQLADGLLVIPLPVEEQCRG  
VLSEPLPDLQLLTGDIRYDEAMGYPMVQQWRVRSNLYRVKLSTITLSAGFTNVLKILTKE  
SSRDELLSFIQHYGSHYIAEALYGSELTCTIHFPSKKVQQQLWLQYQKETTELGSKKELK  
SMPFITYLSGLLTAQMLSDDQLISGVEIRCEEKGRCPSTCHLCRRPGKEQLSPTPVLEI  
NRVPLYTLIQDNGTKEAFKNALMSSYWCSGKGDVIDDWCRCDLSAFDASGLPNCSPLPQ  
PVLRLSPTVEPSSTVVSLEWVDVQPAIGTKVSDYILQHKKVDEYTDLDLYTGEFLSFADD  
LLSGLGTSCVAAGRSHGEVPEVSIYSVIFKCLEPDGLYKFTLYAVDTRGRHSELSTVTLR  
TACPLVDDNKAEEIADKIYNLYNGYTSKGEEQQTAYNTLMEVVSASMLFRVQHHYNSHYEKF  
GDFVWRSEDELGPRKAHLILRRLERVSSHCSLLRSAYIQSRVDTIPYLFCSRSEEVVPAG  
MVWYSILKDTKITCEEKMSMARNTYGETKGR

### **Astn2-201 (mouse isoforms 2, 1300 aa)**

MAAAGARRSPGRGLGLRGRPRLGFHPGPPPPPPPLLLLLFLLLLPPPPLLAGATAAAASR  
EPDSPCRLKTVTSTLPALRESDIGWSGARTGAAAGAGAGTGAGAGAAAAAASAASPGSA  
GSAGTAAESRLLLLFVRNELPGRIAVQDDLDNTELPFFTLEMSGTAADISLVHWRQQWLEN  
GTLYFHVSMSSSGQLAQATAPTLQEPSEIVEEQMHILHISVMGGLIALLLLLLVFTVALY  
AQRWQKRRRIIPQKSASTEATHEIHYIPSVLLGPQARESFRSSRLQTHNSVIGVPIRETP  
ILDDYDYEEEEPPRRANHVSREDEFSGQMTHALDSLGRPGEEKVEFEKKGGISFGRTKG  
TSGSEADDETQLTFYTEQYRSRRRSKGLLKSPVNKTALTIAVSSCILAMVCGNQMSCPL  
TVKVTLHVPEHFIADGSSFVSEGSYLDISDWLNPAKLSLYYQINATSPWVRDLCGQRTT  
DACEQLCDPDTGECSCHEGYAPDPVHRHLCVRSWDWGQSEGPWPYTTLERGYDLVTGEQAP  
EKILRSTFSLGQGLWLPVSKSFVPPVELSINPLASCKTDVLVTEDPADVREEAMLSTYF  
ETINDLLSFGPVRDCSRNNGGCTRNFKCVSDRQVDSSGCVCPEELKPMKDGSGCYDHSK  
GIDCSDGFNGGCEQLCLQQTLPYDTSSTIFMFCGCVVEEYKLAPDGKSCMLSDVCEG  
PKCLKPDSKFNDTLFGEMLHGYNNTQHVNQGVFQMTFRENNFIKDFPQLADGLLVIPL  
PVEEQCRGVLSEPLPDLQLLTGDIRYDEAMGYPMVQQWRVRSNLYRVKLSTITLSAGFTN  
VLKILTKESSRDELLSFIQHYGSHYIAEALYGSELTCTIHFPSKKVQQQLWLQYQKETTE

LGSKKELKSMPFITYLSGLLTAQMLSDDQLISGVEIRCEEKGRCPSTCHLCRRPGKEQLS  
PTPVLLEINRVVPLYTLIQDNGTKEAFKNALMSSYWCSGKGDVIDDWCRCDLSAFDASGL  
PNCSPPLPQPVLRLSPTVEPSSTVVSLEWVDVQPAIGTKVSDYILQHKKVDEYTDLDLYTG  
EFLSFADDLLSGLGTSCVAAGRSHGEVPEVSIYSVIFKCLEPDGLYKFTLYAVDTRGRHS  
ELSTVTLRTACPLVDDNKAEIADKIYNLYNGYTSGKEQQTAYNTLMEVVSASMLFRVQHH  
YNSHYEKFGDFVWRSEDELGPRKAHLILRRLERVSSHCSLLRSAYIQSRVDTIPYLFGR  
SEEVRPAGMVWYSILKDTKLTCEEKVSMARNTYGETKGR

### JDUP sequence (1103 aa)

MAAAGARRSPGRGLGLRGRPRLGFHPGPPPPPPPLLLLLFLLLLPPPPLL LAGATAAAAASREP  
DSPCRLKTVTVSTLPALRESDIGWSGARTGAAAGAGAGTGAGAGAAAAASAASPGSAGSAG  
TAAESRLLLLFVRNELPGRIAVQDDLDNTELPFFTTLEMSGTAADISLVHWRQQWLENGTLYFH  
VSMSSSGQLAQATAPTLQEPSEIVEEQMHILHISVMGGLIALLLLLLVFTVALYAQRRWQKR  
RRIPOKSASTEATHEIHYIPSVLLGPQARESFRSSRLQTHNSVIGVPIRETPILDYDYE  
EPPRRANHVSREDEFGSQMTHALDSLGRPGEEKVEFEKGGISFGRTKGTSGSEADDETQL  
TFYTEQYRSRRRSKGLLKSPVNKTALTLIAVSSCILAMVCGNQMSCPLTVKVTLHVPEHFIA  
DGSSFVSEGSYLDISDWLNPAKLSLYQINATSPWVRDLCGQRTTDACEQLCDPDTGECSC  
HEGYAPDPVHRHLCVRSDWGQSEGPWPYTTLERGYDLVTGEQAPEKILRSTFSLGQGLWLPV  
SKSFVPPVELSINPLASCKTDVLVTEADPADVREEAMLSTYFETINDLLSSFGPVRDCSRNN  
GGCTRNFKCVSDRQVDSSGVCPEELKPMKDGSGCYDHSKIDCSDGFNGGCEQLCLOQTLP  
LPYDTTSSTIFMFCGCVVEEYKLPADGKSCMLSDVCEGPKCLKPDSKFNDTLFGEMLHG  
YNNRTQHVNQGVFQMTFRENNEFIKDFPQLADGLLVIPLPVEEQCRGVLSEPLPDLQLITGDIRY  
DEAMGYPMVQQWRVRSNLYRVKLSTITLSAGFTNVLKILTKESSRDELLSFIQHYGSHYIAE  
ALYGSELTCIIHFPSKKVQQQLWLQYQKETTTELGSKKELKSMPFITYLSGLLTAQMLSDDQL  
ISGVEIRCEEKGRCPSTCHLCRRPGKEQLSPTPVLLEINRVVPLYTLIQDNGTKEAFKNALM  
SSYWCSGKGDVIDDWCRCDLSAFDASGLPNCSPPLPQPVLRLSPTVEPSSTVVSLEWVDVQPA  
IGTKVSDYILQHKKVDEYTDLDLYTGLHQC PKDPDQREQSGTYGETKGR

**Red**: peptide against which antibody was raised (Wilson et al. 2010) and also used for depleting the antibody sera for anti-ASTN2 antibody

**Green**: endosomal/lysosomal sorting signals

**Blue**: protein sequences encoded by alternating exons

Fig. S3

HEK cells bioRxiv preprint doi: <https://doi.org/10.1101/337618>; this version posted June 7, 2018. The copyright holder for this preprint (which was not certified by peer review) is the author/funder. All rights reserved. No reuse allowed without permission.

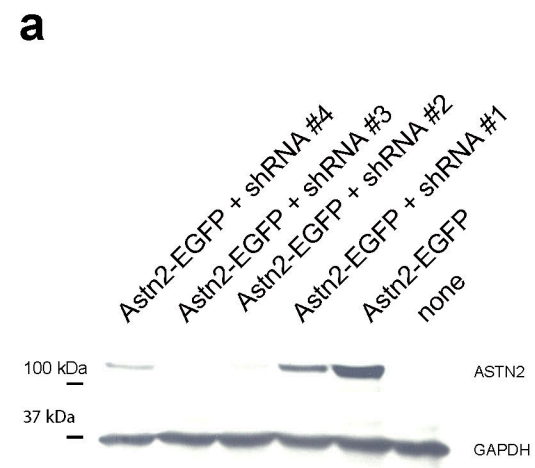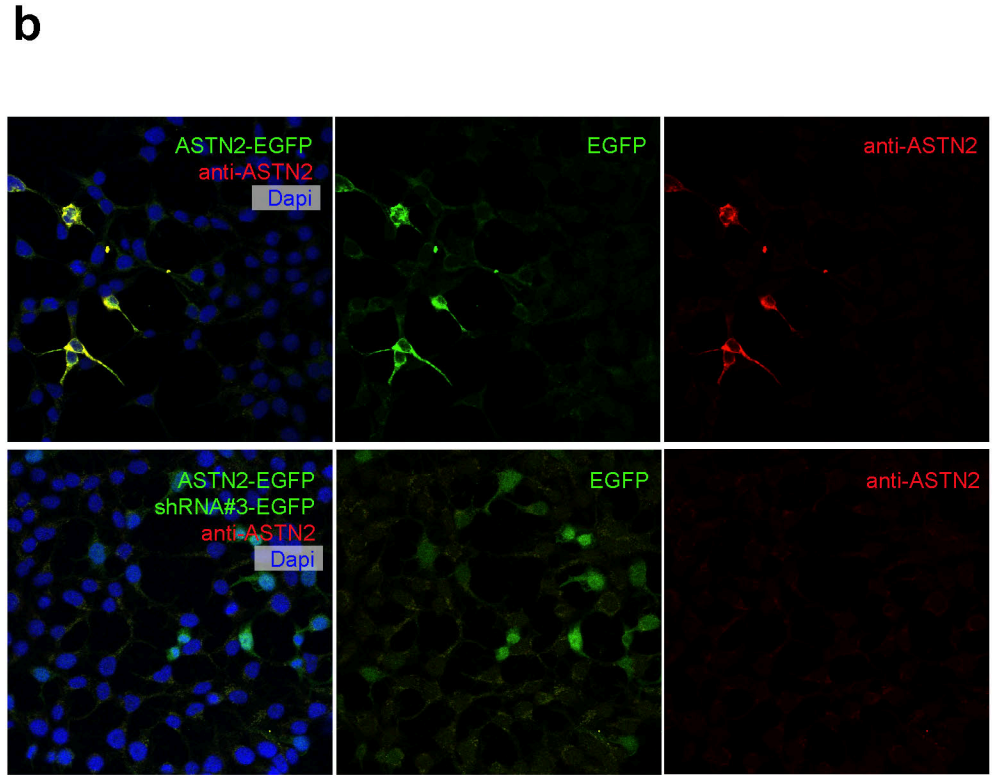

neurons

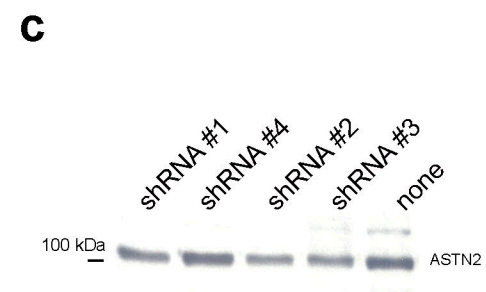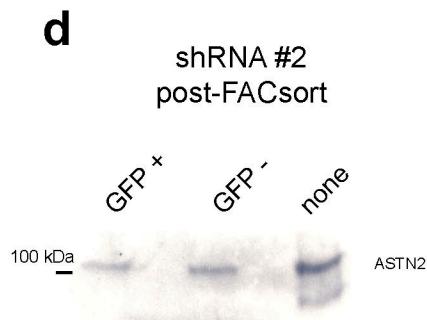



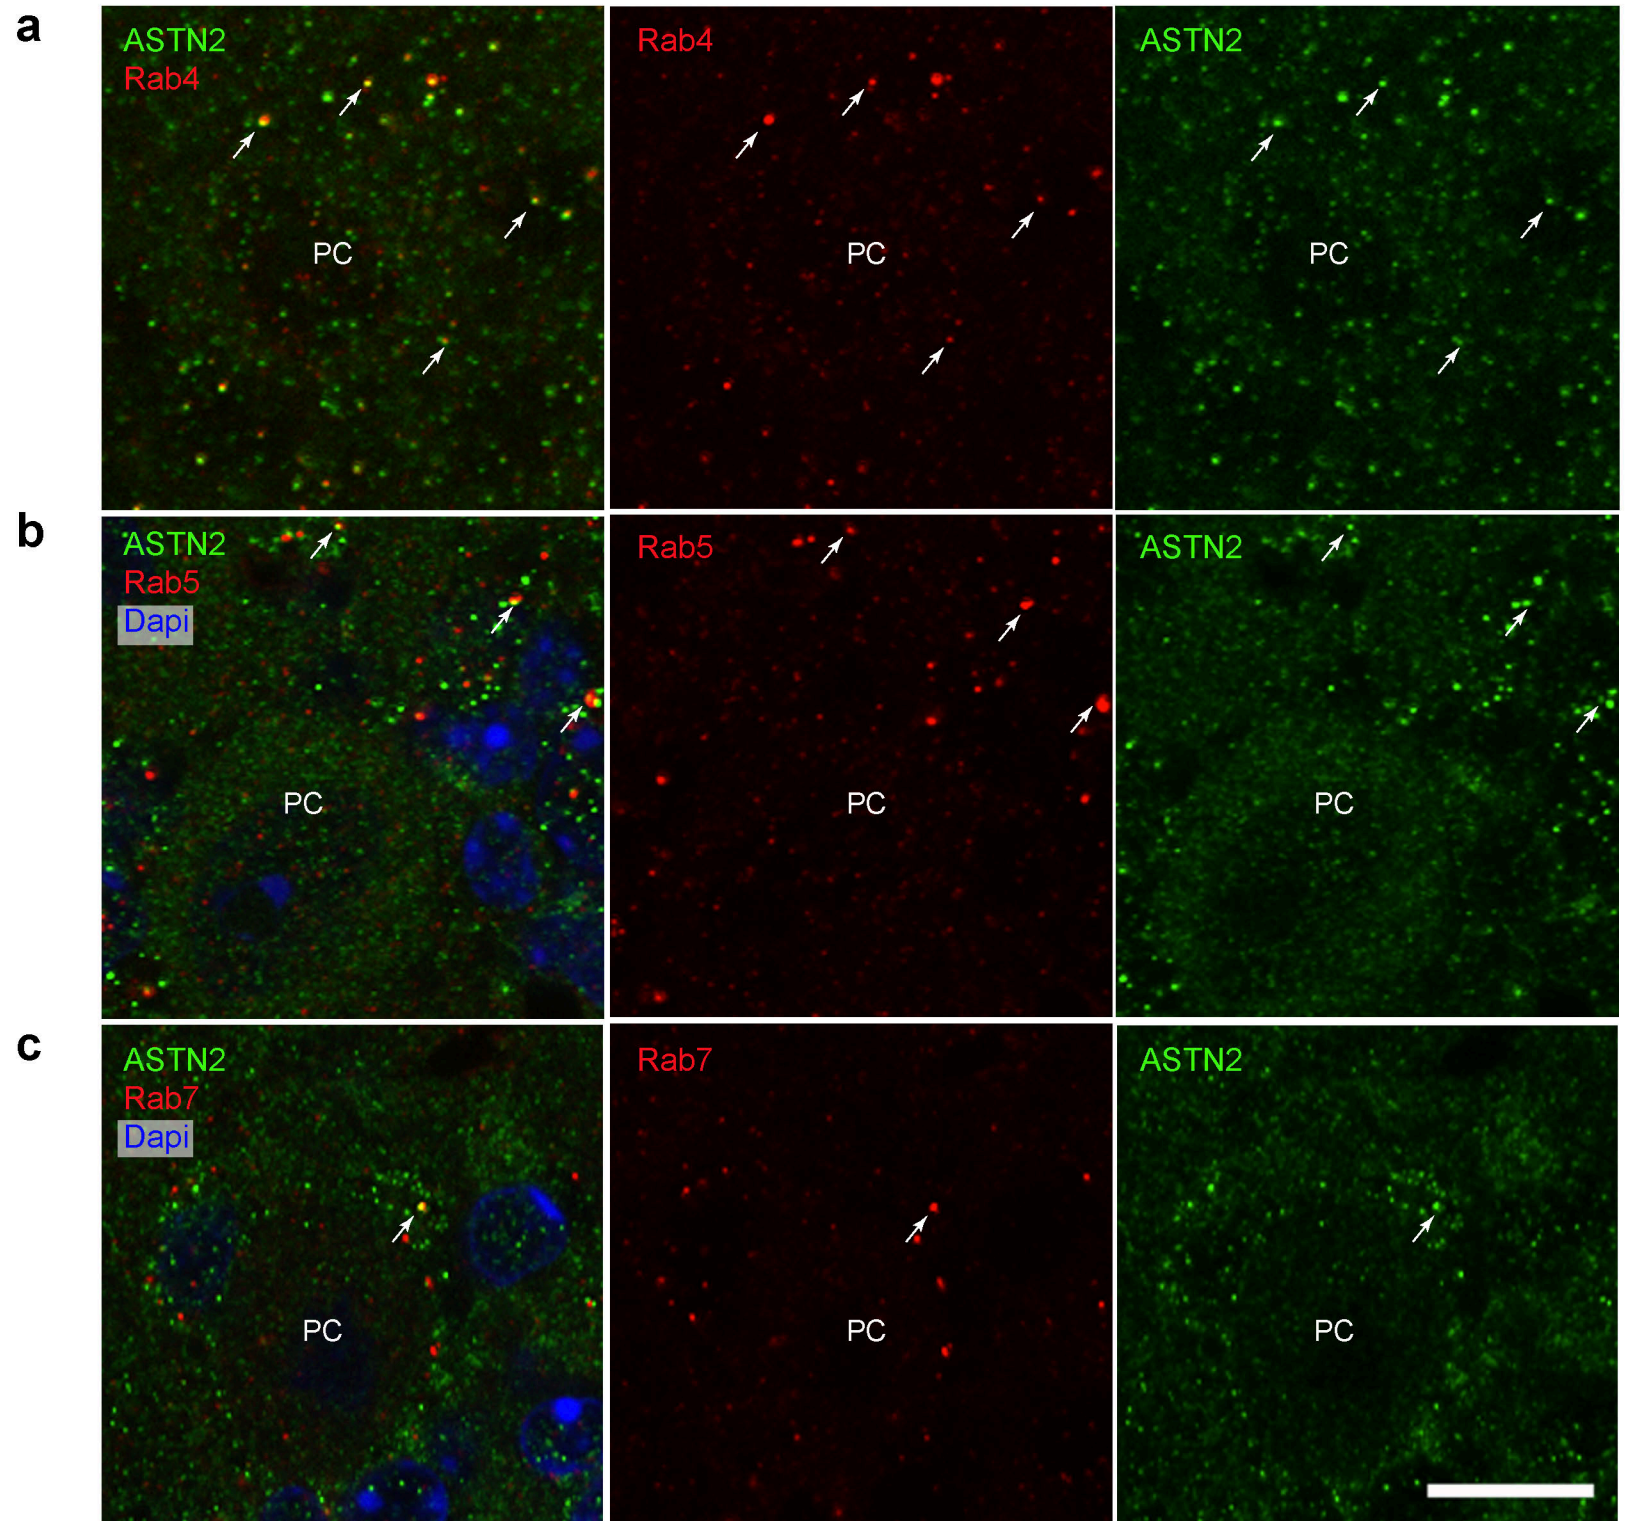



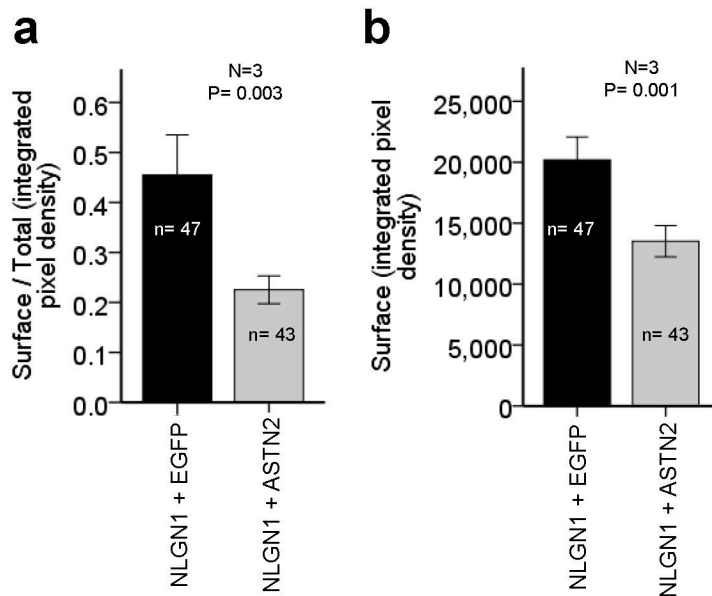

# Fig. S6

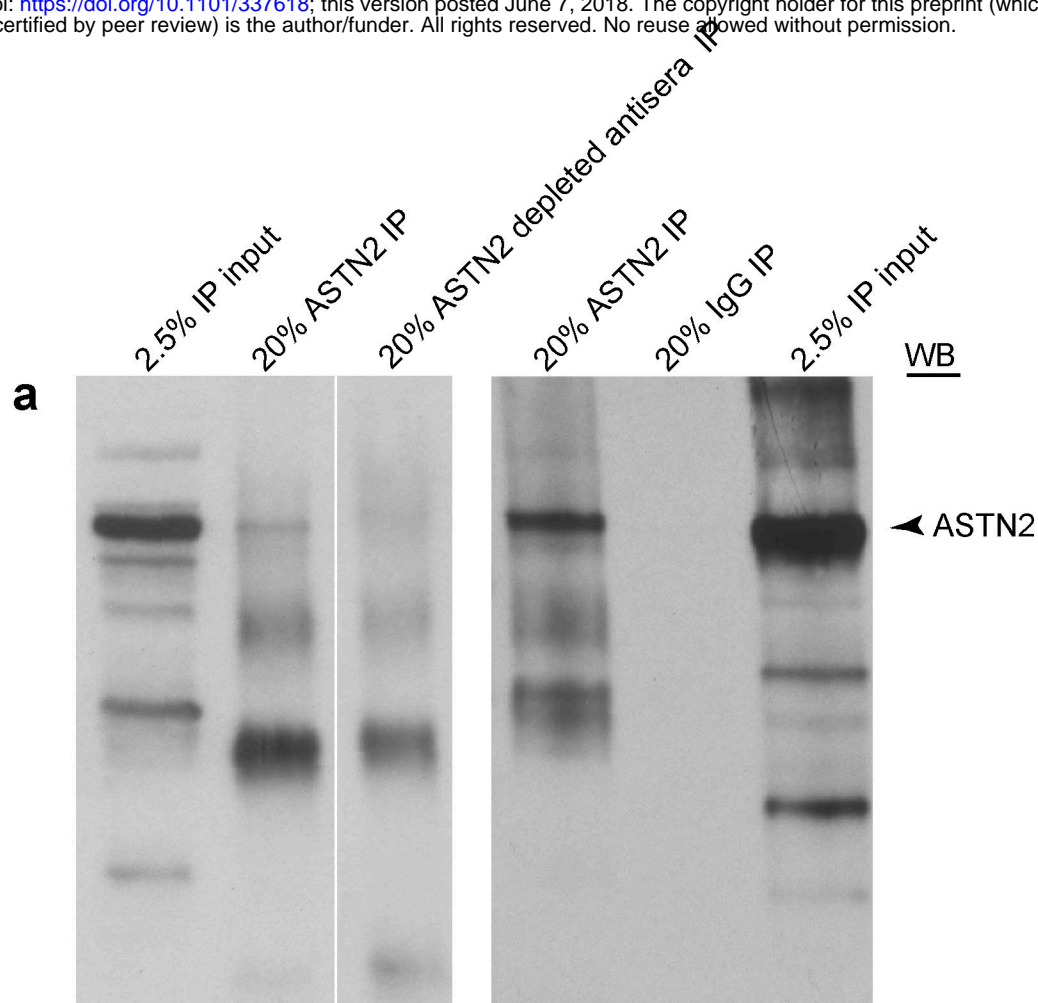

## b

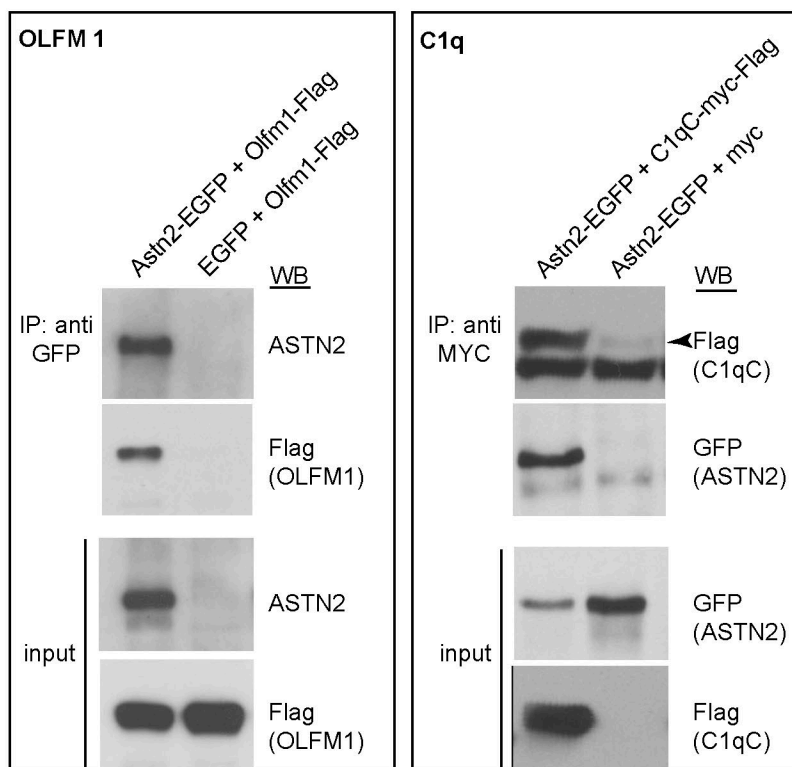

## c

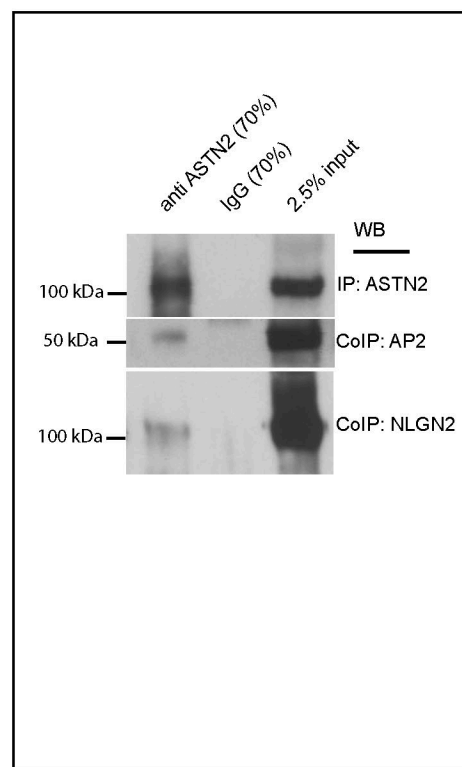

Fig. S7

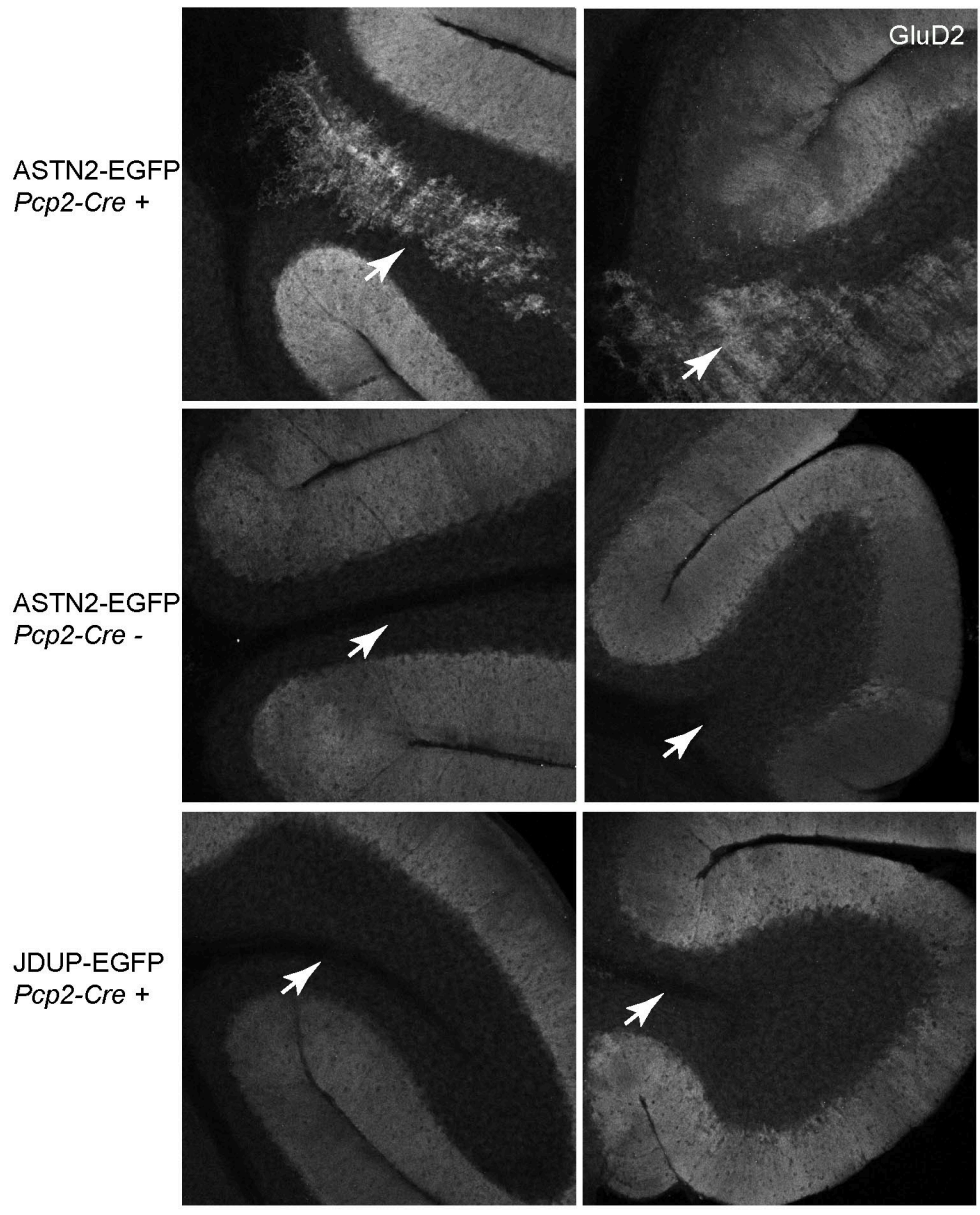

## Supplementary Materials and Methods

*RT-PCR and qRT-PCR:* RT-PCR was carried out according to the manufacturer's descriptions using the HotStarTaq *PLUS* DNA Polymerase kit (Qiagen) with the following primers (*ASTN2*: forward, 5'-TACTGGTGCTCCAGGGAAAGG, reverse, 5'-CCCAATAGCTGGCTGAACAT,  $\beta$ -*ACTIN*: forward, 5'-AAACTGGAACGGTGAAGGTG, reverse, 5'-AGAGAAGTGGGGTGGCTTTT). qRT-PCR was performed with TaqMan primer/probe sets (*ASTN2* TaqMan gene expression assay (#Hs01024740\_m1) which detects exon boundary 18-19, Human *GUSB* (Beta Glucuronidase) Endogenous Control (#4333767T, Applied Biosystems) and TaqMan Fast Advanced Master Mix, all according to the manufacturers' descriptions on a Roche LightCycler 480 (Roche).

*Immunohisto/cytochemistry:* Briefly, vibratome sections were blocked with 15% normal horse serum (Gibco), 0.1% saponin in PBS overnight and then incubated with primary antibodies overnight at 4°C and with Alexa Fluor® secondary antibodies for 2 hours to overnight at room temperature and 4°C respectively. *In vitro* cultured cells were blocked in 1% normal horse serum, 0.05% Triton, incubated in primary antibodies overnight at 4°C followed by secondary Alexa Fluor® antibodies for 1 hour at room temperature. Sections/cells were mounted with ProLong® Gold anti-fade mounting media and sections were covered with 1.5 thickness Fisherbrand cover glass.

*Antibodies used for immunohistochemistry, immunoprecipitation and Western blot:* Primary antibodies, Rabbit: anti-ASTN2 (1:1000-2000 on sections, and 1:500 on cells, 1:200 for Western Blot (1), anti-Calbindin D28-k (1:500, Swant #CB38), anti-GFP (1:500, Invitrogen #A11122). Mouse: anti-Calbindin (1:500, Swant #300), anti-Flag (1:1000, Sigma #1804), anti-HA (1:500, Roche #1 583 816 001), anti-cMYC (1:50, Calbiochem #OP10), anti-AP-2 (1:250, BD Transduction Laboratories #611350), anti-NLG2 (1:100, Synaptic Systems #129 511), anti-GAPDH (1:10,000, Chemicon #mab374) anti-ROCK2 (1:1000, BD Transduction Laboratories #610623), anti-Rab4 (1:100, BD Transduction Laboratories #610888), anti-Rab5 (1:200, Synaptic Systems #108011), anti-Rab7 (1:100, Santa Cruz #sc-376362). Goat: anti-GluD2 (1:100, Santa Cruz #sc-26118). Secondary antibodies: Donkey anti-mouse, -rabbit, and -goat IgG conjugated to Alexa 405 (abcam), 555, 633, and 647 (Molecular Probes), all used at 1:300. HRP-conjugated secondary antibodies (Jackson ImmunoResearch) were used at 1:8000 (anti-mouse, # 515-035-062) or 1:3000 (anti-rabbit #111-035-144) for Western blots.

*cDNA/ShRNA constructs:* The following plasmids were used: pGIPZ lentiviral plasmids containing *Astn2* shRNA (# V3LMM440320) and scramble shRNA (Thermo Scientific Open Biosystems), OLFM1-MYC-Flag (Origene #MR207779), AP2s-MYC-Flag (Origene #MR200768), Clqc-MYC-Flag (Origene #MR203092), pCAG:GPI-GFP (Addgene #32601), pMES-SLC12a5-HA (50), pNice-NLGN1-CFP, pNice-NLGN2-CFP, pNice-NLGN3-YFP, pNice-NLGN4-YFP (51, 52), pNice-NLGN1-HA-YFP (gift from Dr

Peter Scheiffele), pCdh2-CFP (Cdh2 cDNA gift from Dr. Richard Huganir) (53), pRK5-MYC and pMSCX $\beta$ -Venus- $\alpha$ -tubulin (used for flow cytometry control) were provided by Dr David Solecki. ASTN2 and JDUP containing constructs were created as follows: the sequence between the XbaI/BamHI sites of the pFU-cMVIIA-PE lentiviral plasmid (54) was removed including the DsRed/LoxP sequences. The full length *Astn2* mouse cDNA was amplified from previously reported plasmids (1) and modified to include the 5' region of the gene, using a 5' primer with an XbaI restriction site and a 3' primer with a BamHI site. This sequence (full length ASTN2 splice variant 201, [www.ensembl.org](http://www.ensembl.org)) was inserted in frame into the pFU backbone at XbaI/BamHI, creating pFU-Astn2-EGFP. To create the conditional construct, pFU-cAstn2-EGFP, a LoxP-dsRED-LoxP sequence (synthesized as a gblock fragment by Integrated DNA Technologies, IDT) was inserted into the XbaI site, upstream of the *Astn2* sequence. pFU-cJDUP-EGFP was created by excising the sequence between the BsiW1/BlpI sites of pFU-cAstn2-EGFP and replacing it with a synthesized sequence representing a FNIII domain deleted version (gblock, IDT). The non-conditional version (pFU-JDUP-EGFP) was created by excising the LoxP-DsRED-LoxP sequence in pFU-cJDUP-EGFP with XbaI and re-ligating the plasmid. ASTN2-HA-FLAG and JDUP-HA-FLAG plasmids were made by replacing the EGFP sequence in pFU-ASTN2-EGFP and pFU-JDUP-EGFP with in-frame HA-FLAG sequences.

*Knockdown of ASTN2 in neurons:* Mixed cerebellar neurons isolated at P7 were nucleofected (Amaxa Nucleofector II) with shRNA or scrambled constructs using the mouse neuron nucleofector kit (Lonza) according to the manufacturer's description. Cells were cultured as described previously for six days and then processed for Western blot. In a second experiment, GFP+ cells indicative of shRNA construct expression were sorted (BD FACSAria) from GFP-negative cells and then processed for Western blot.
